# Supplementary material for: Stepwise activation mechanism of the scramblase nhTMEM16 revealed by cryo-EM
Source: eLife journal article supplement (doi:10.7554/elife.44364), 2019-02-20
Supplement: supp [file elife-44364-supp-v1.zip]

Archive with 16 entries (16 files):
- elife_poa_e44364_Figure_3_figure_supplement_3.png
- elife_poa_e44364_Figure_1_figure_supplement_1.png
- elife_poa_e44364_Figure_1_figure_supplement_4.png
- elife_poa_e44364_Figure_7_figure_supplement_1.png
- elife_poa_e44364_Figure_2_figure_supplement_2.png
- elife_poa_e44364_Transparent_Reporting_File.pdf
- elife_poa_e44364_Figure_1_figure_supplement_3.png
- elife_poa_e44364_Figure_3_figure_supplement_2.png
- elife_poa_e44364_Figure_8_figure_supplement_1.png
- elife_poa_e44364_Figure_2_figure_supplement_1.png
- elife_poa_e44364_Figure_1_figure_supplement_2.png
- elife_poa_e44364_Video_1.mp4
- elife_poa_e44364_Figure_1_figure_supplement_5.png
- elife_poa_e44364_Video_2.mp4
- elife_poa_e44364_Figure_5_figure_supplement_1.png
- elife_poa_e44364_Figure_3_figure_supplement_1.png
