# Supplementary figures and images for: Stepwise activation mechanism of the scramblase nhTMEM16 revealed by cryo-EM
Source: eLife journal article supplement (doi:10.7554/elife.44364), 2019-02-20

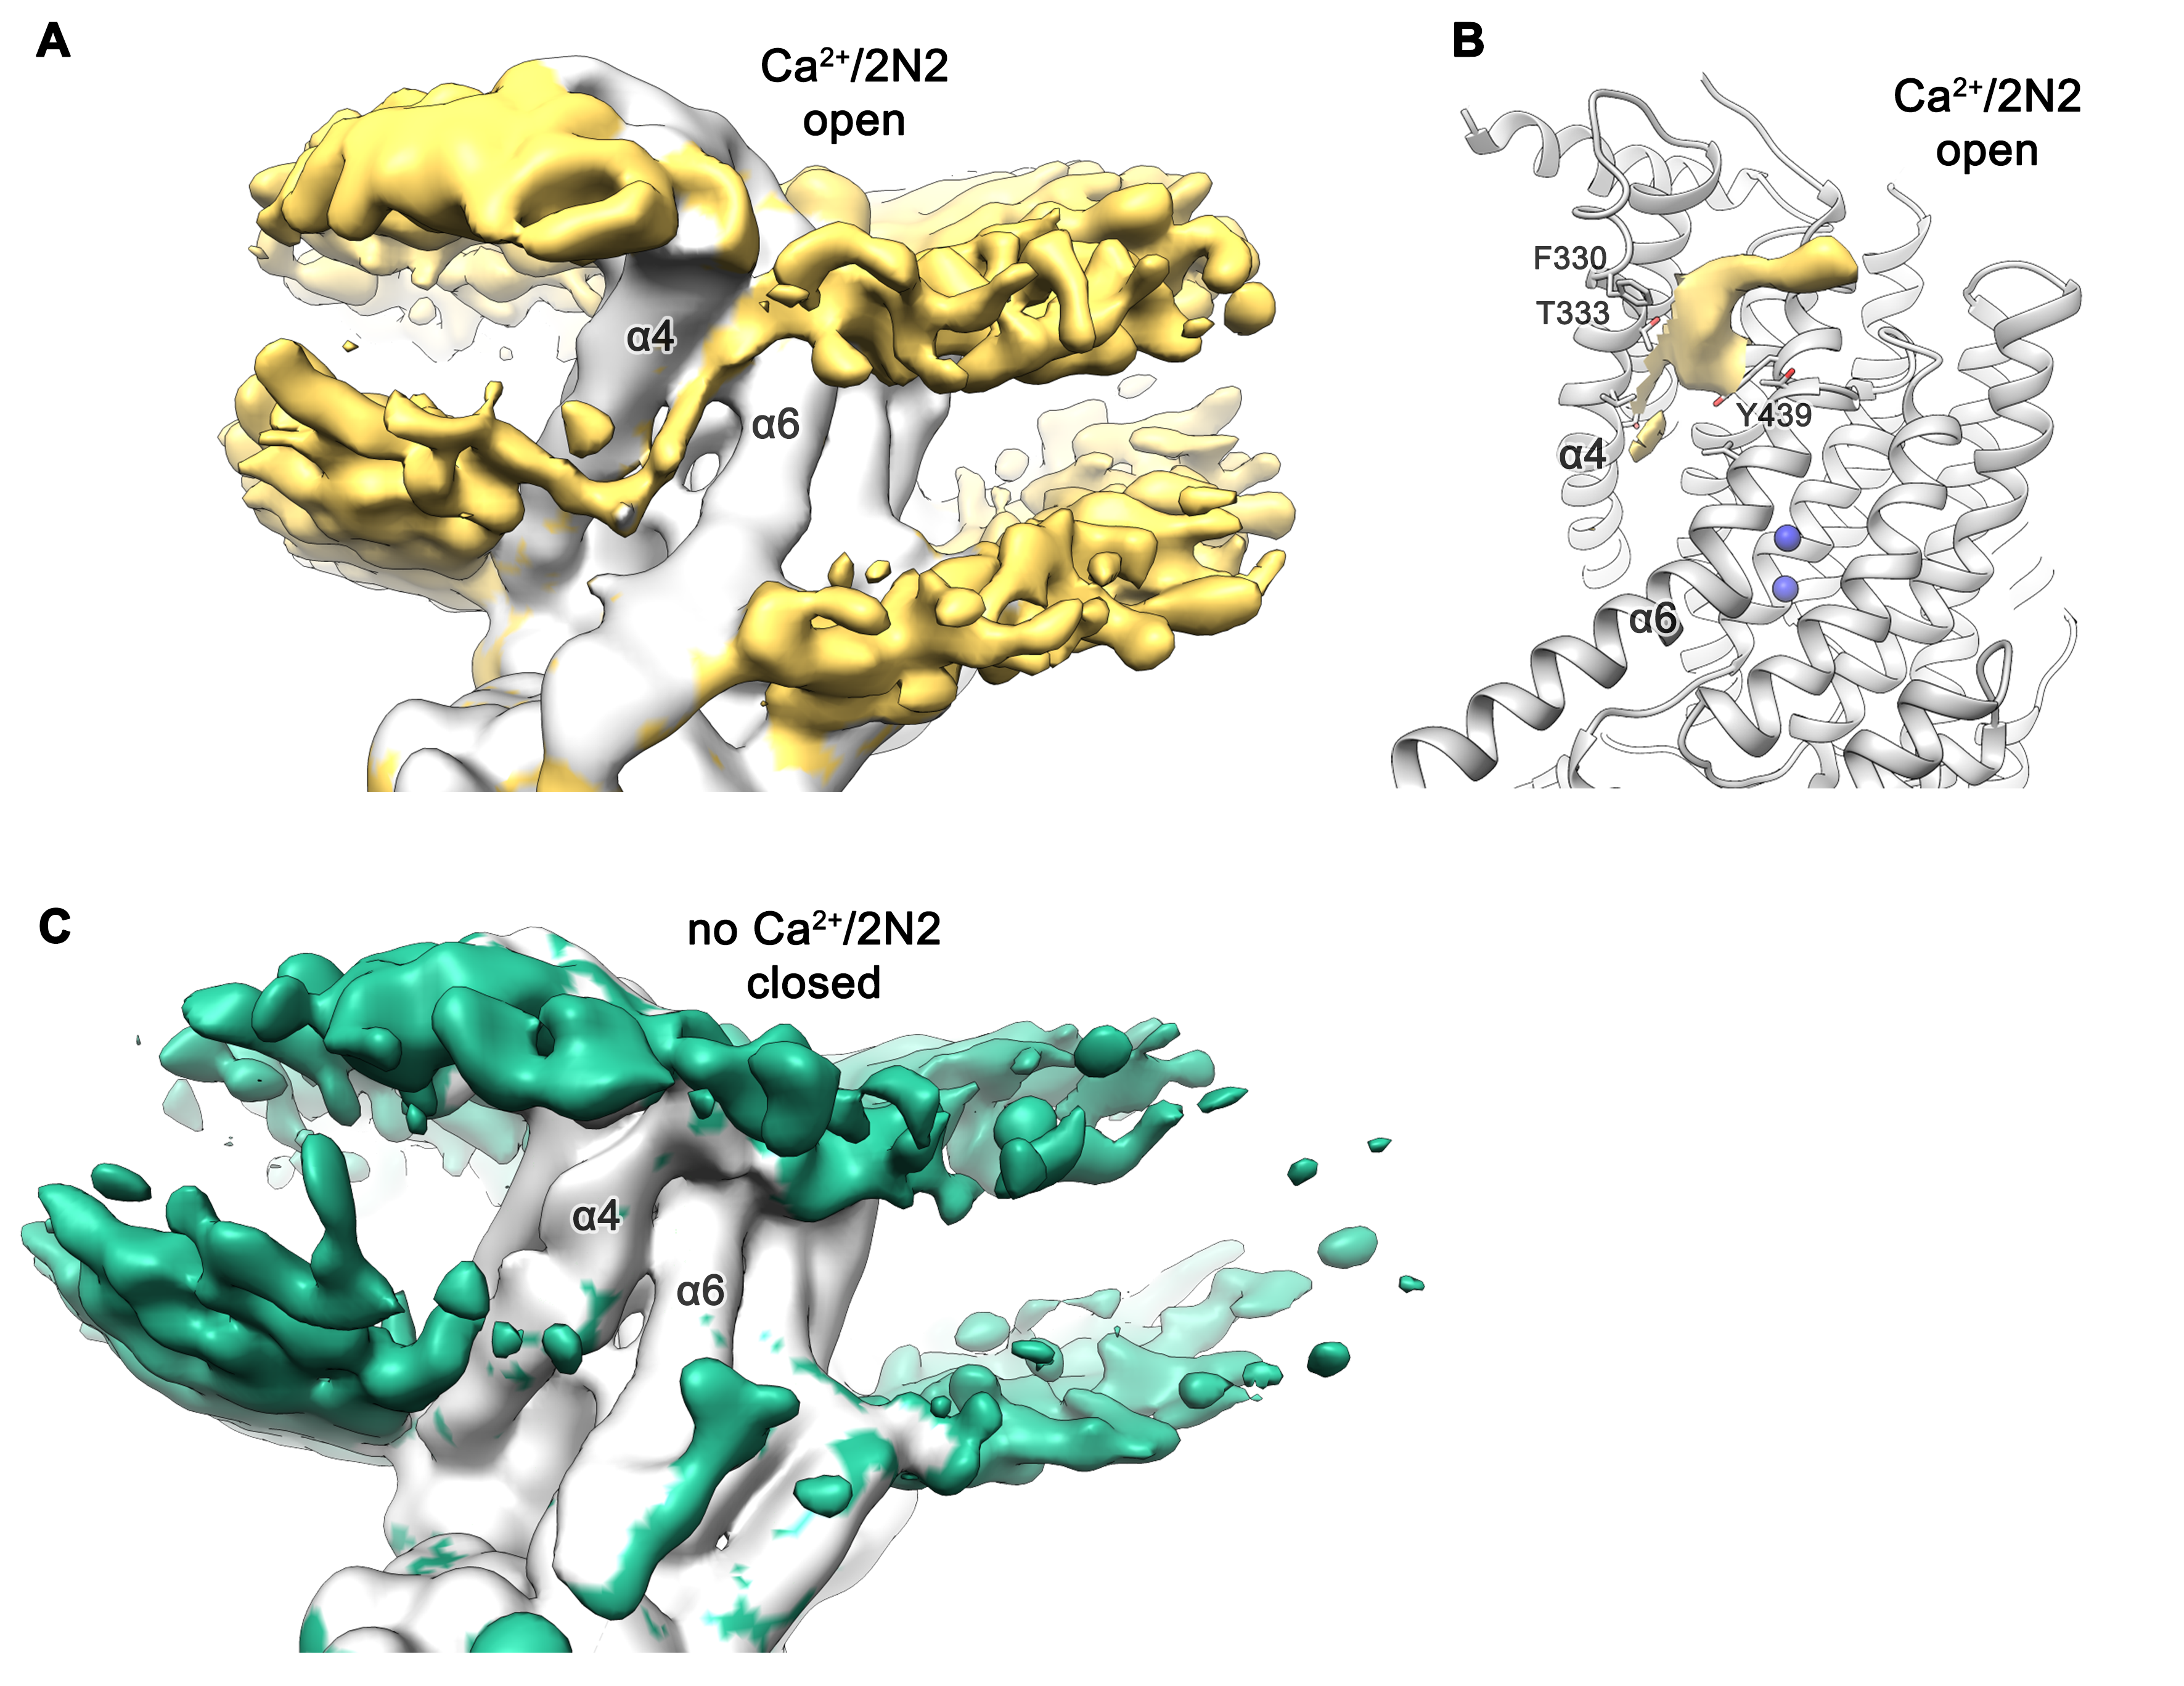

Supplement: supp [file elife-44364-supp-v1.zip › elife_poa_e44364_Figure_3_figure_supplement_3.png]

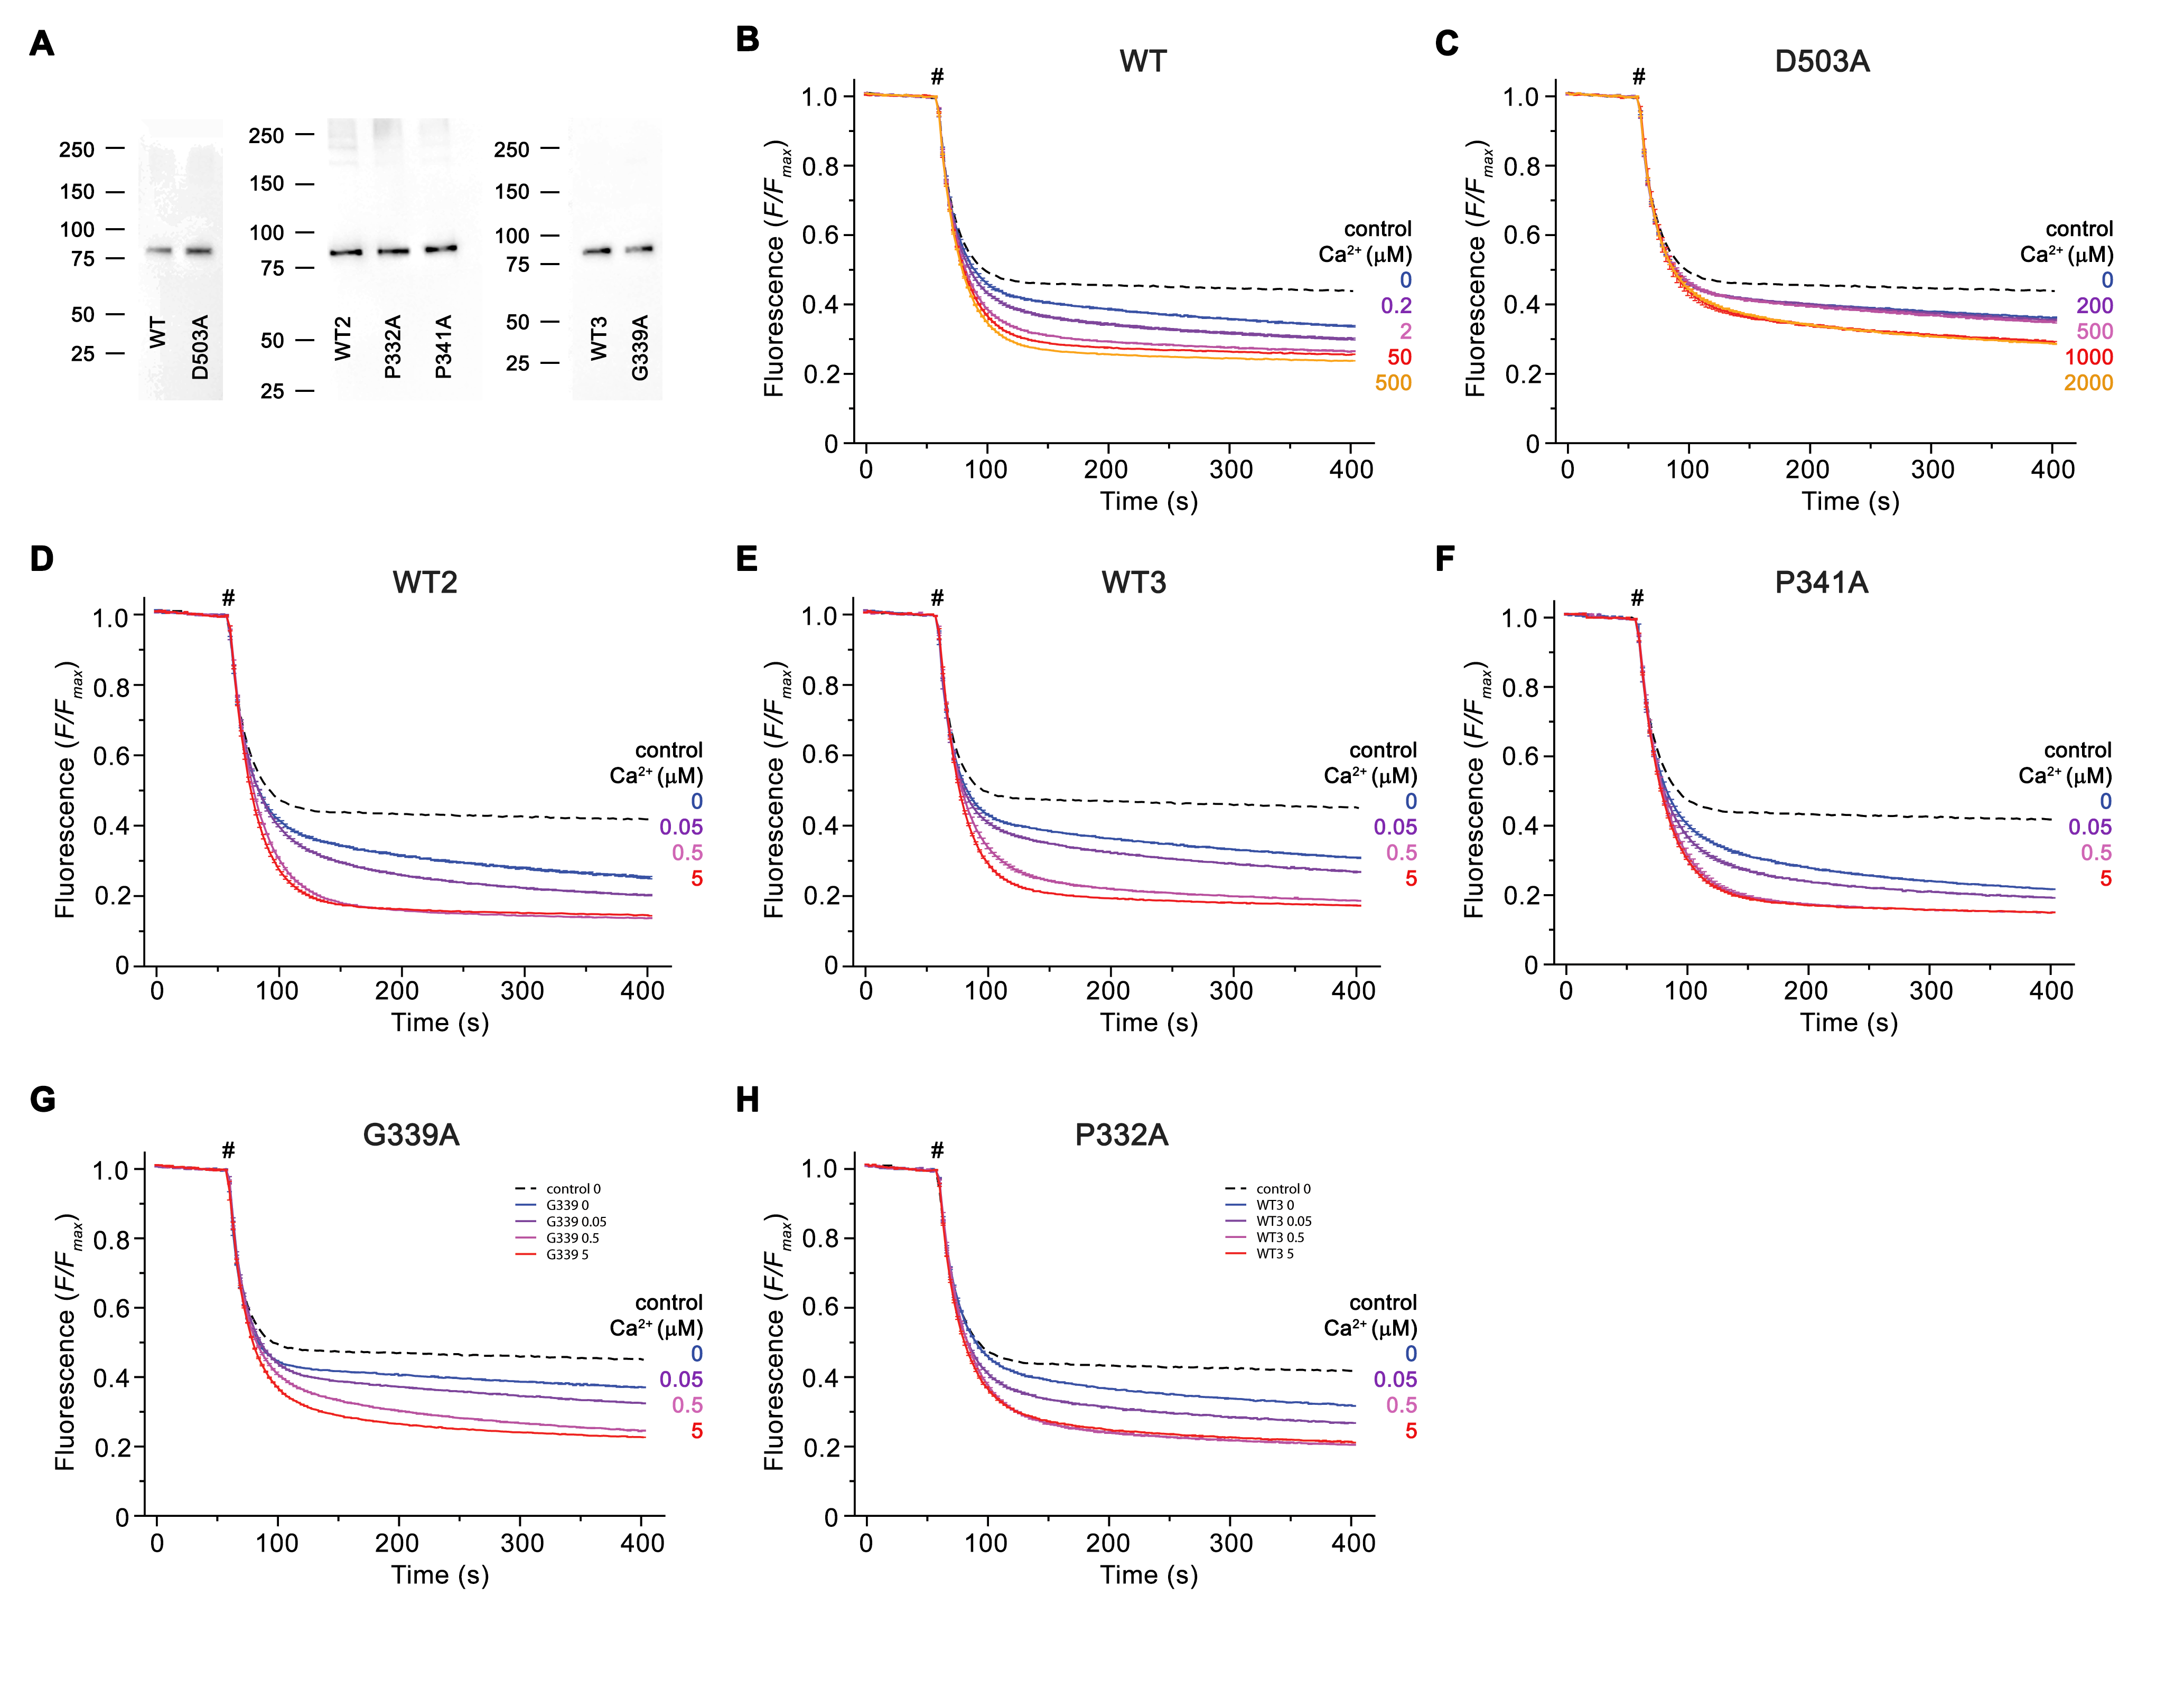

Supplement: supp [file elife-44364-supp-v1.zip › elife_poa_e44364_Figure_1_figure_supplement_1.png]

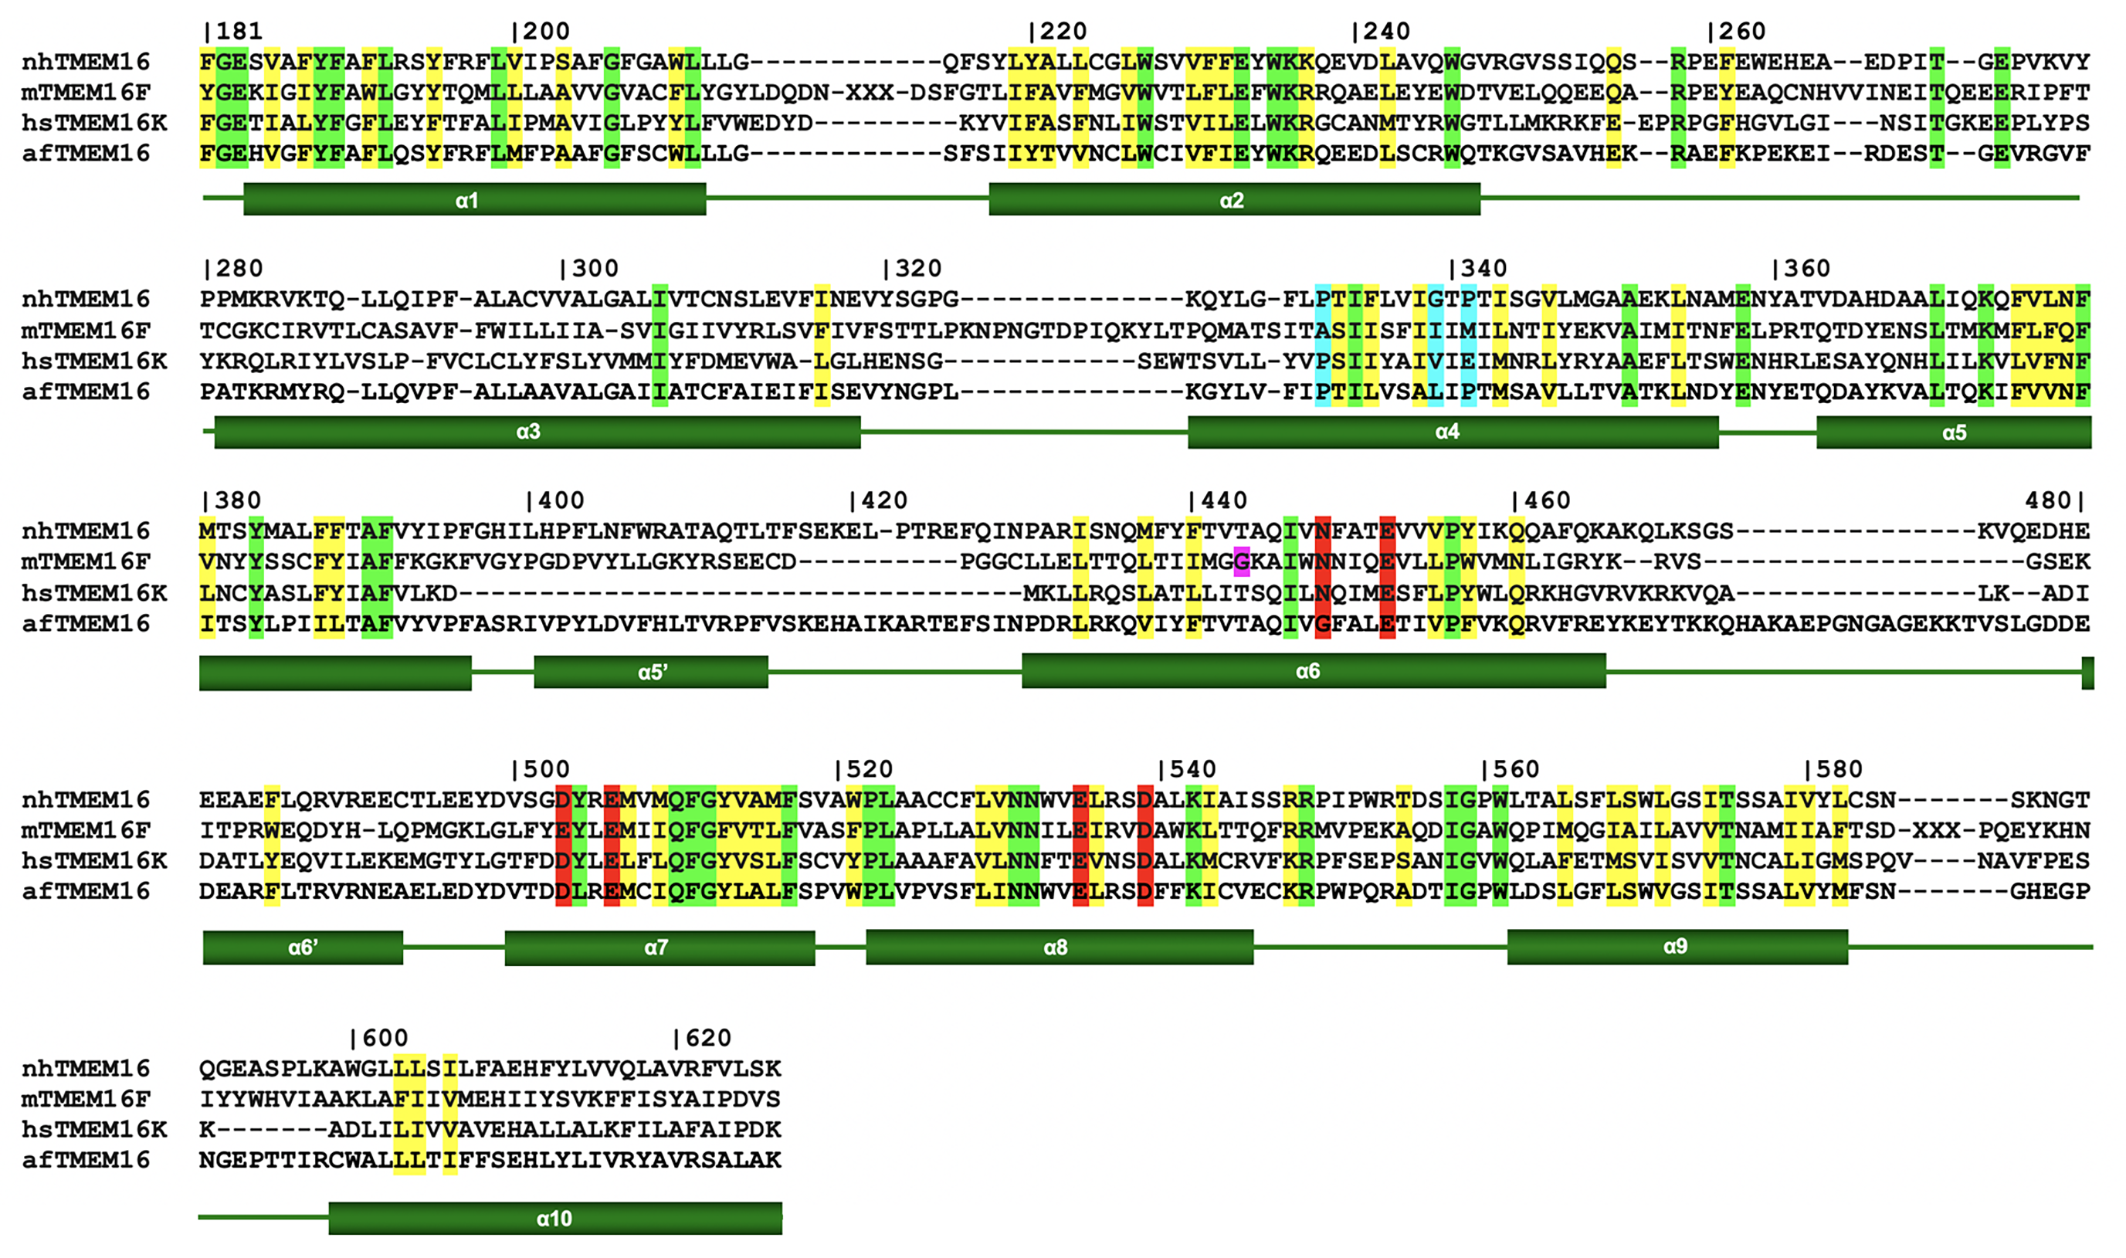

Supplement: supp [file elife-44364-supp-v1.zip › elife_poa_e44364_Figure_1_figure_supplement_4.png]

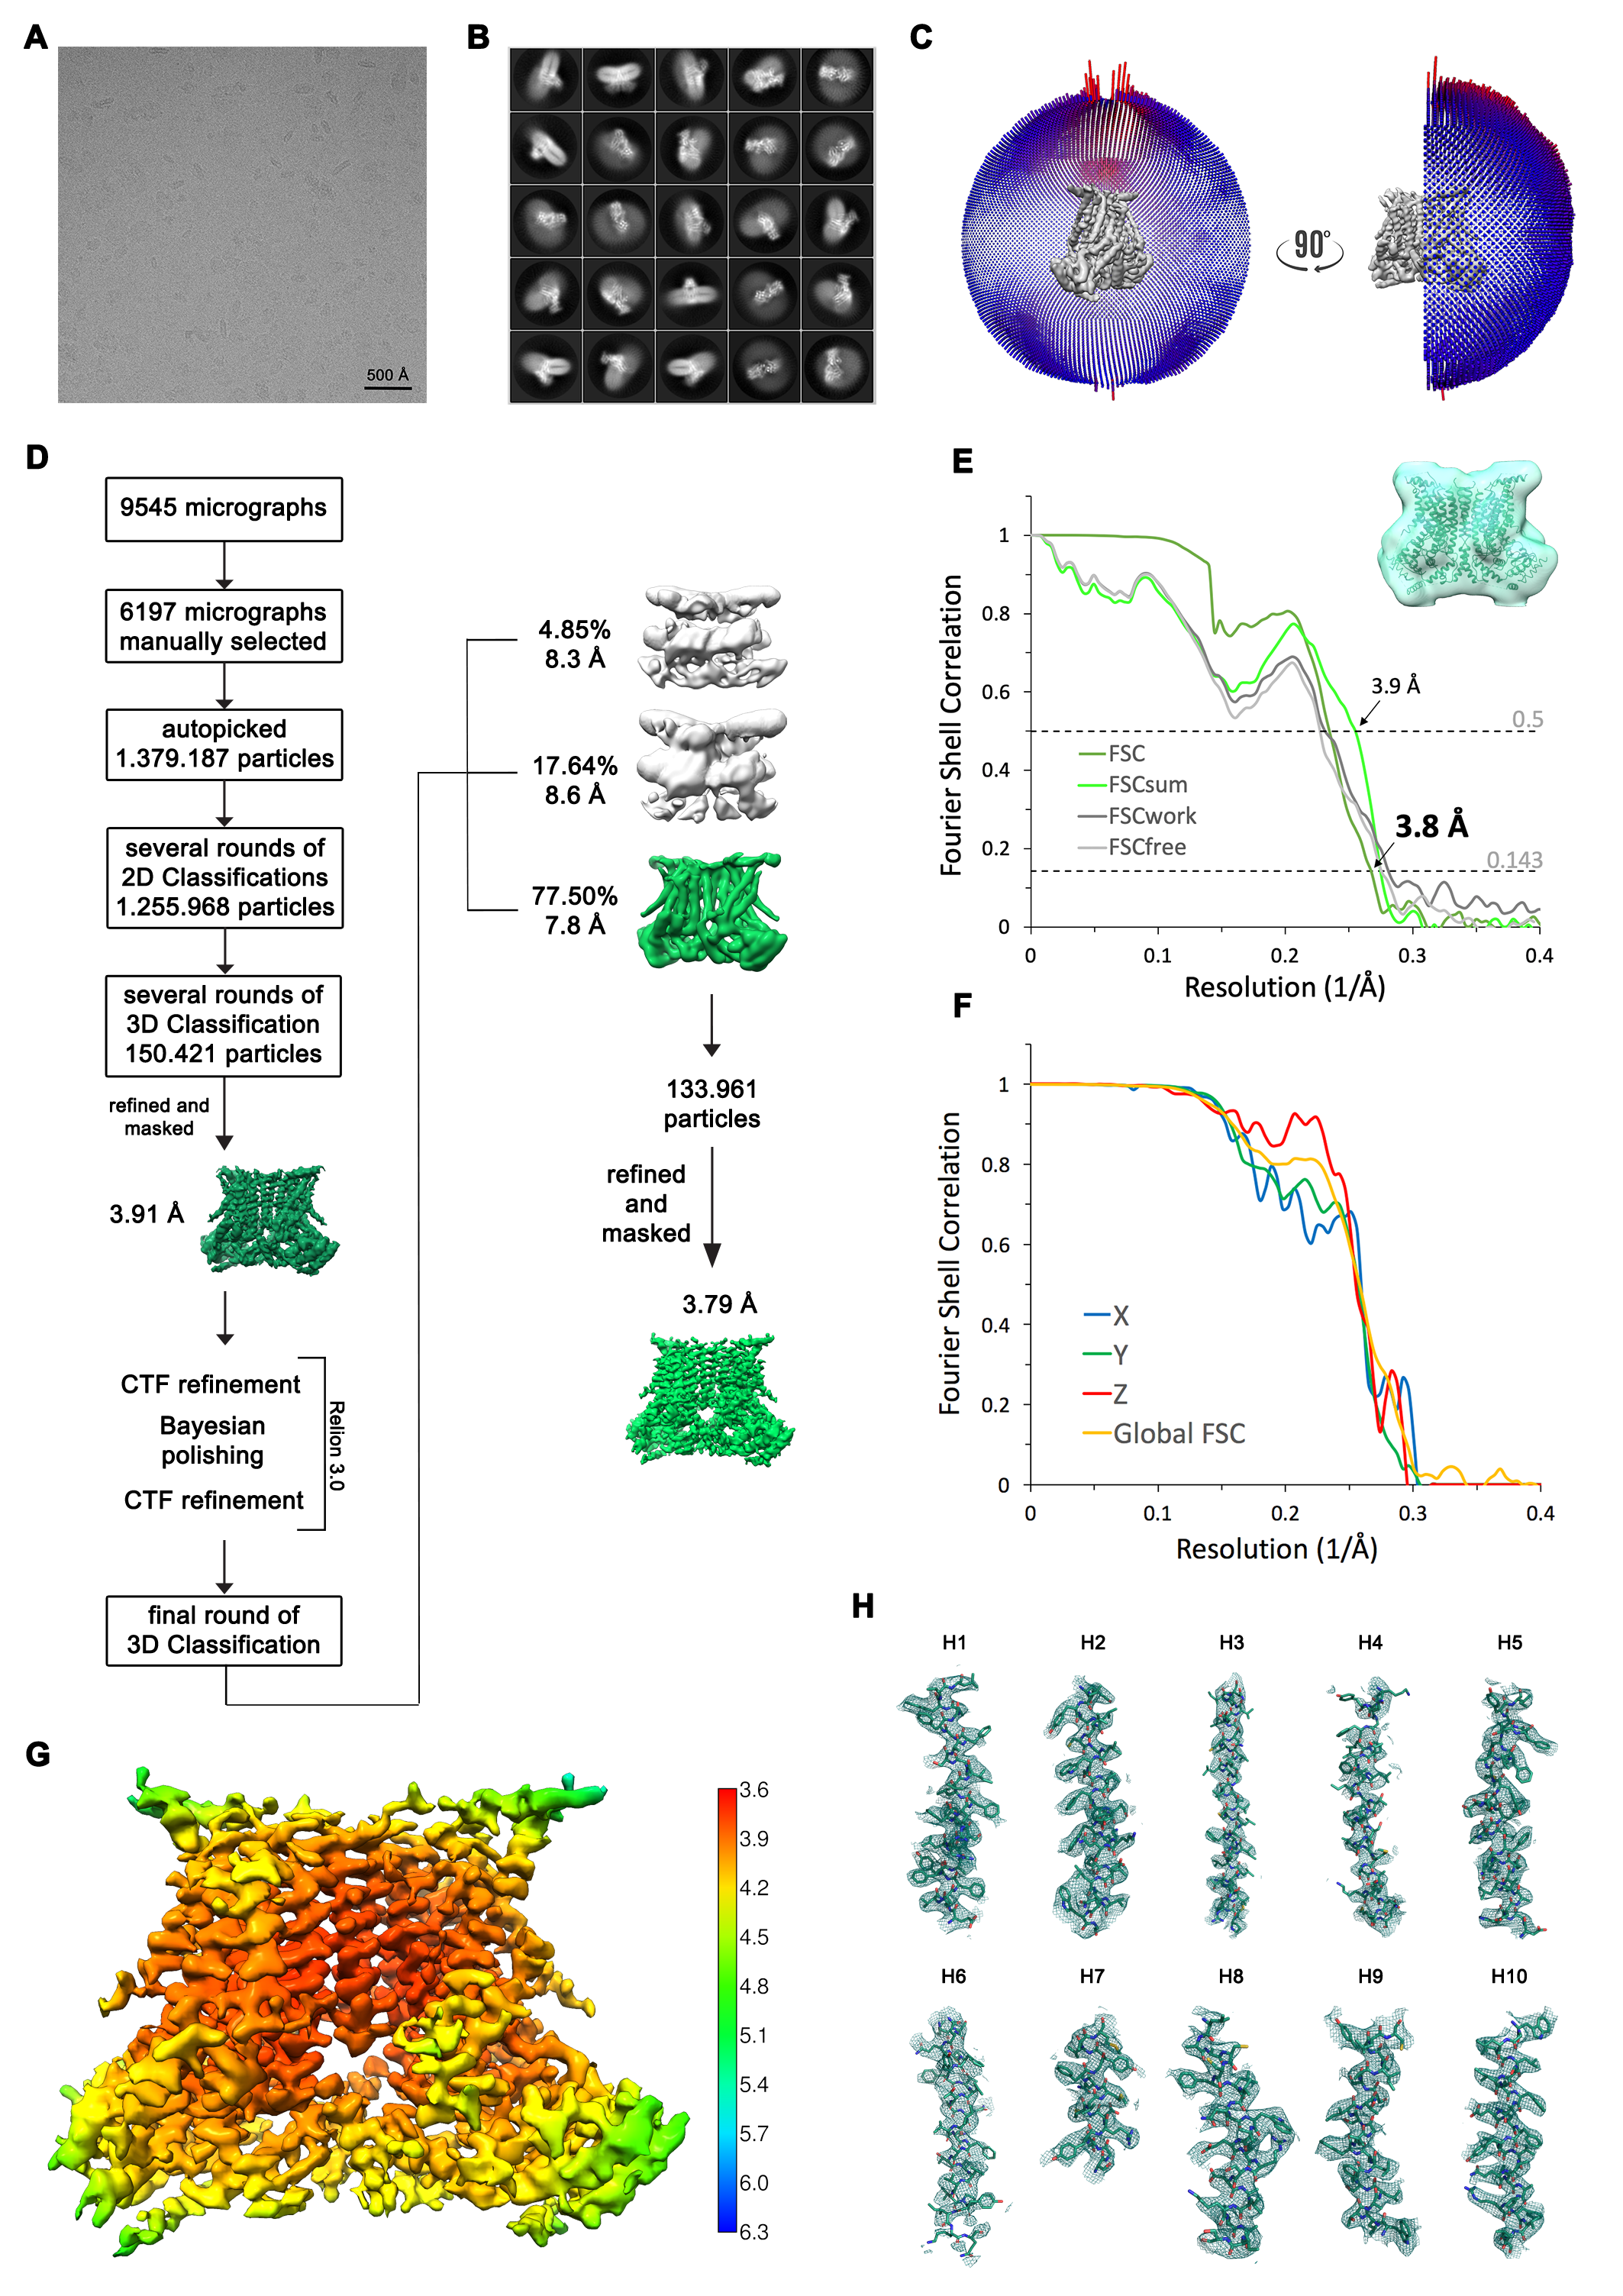

Supplement: supp [file elife-44364-supp-v1.zip › elife_poa_e44364_Figure_2_figure_supplement_2.png]

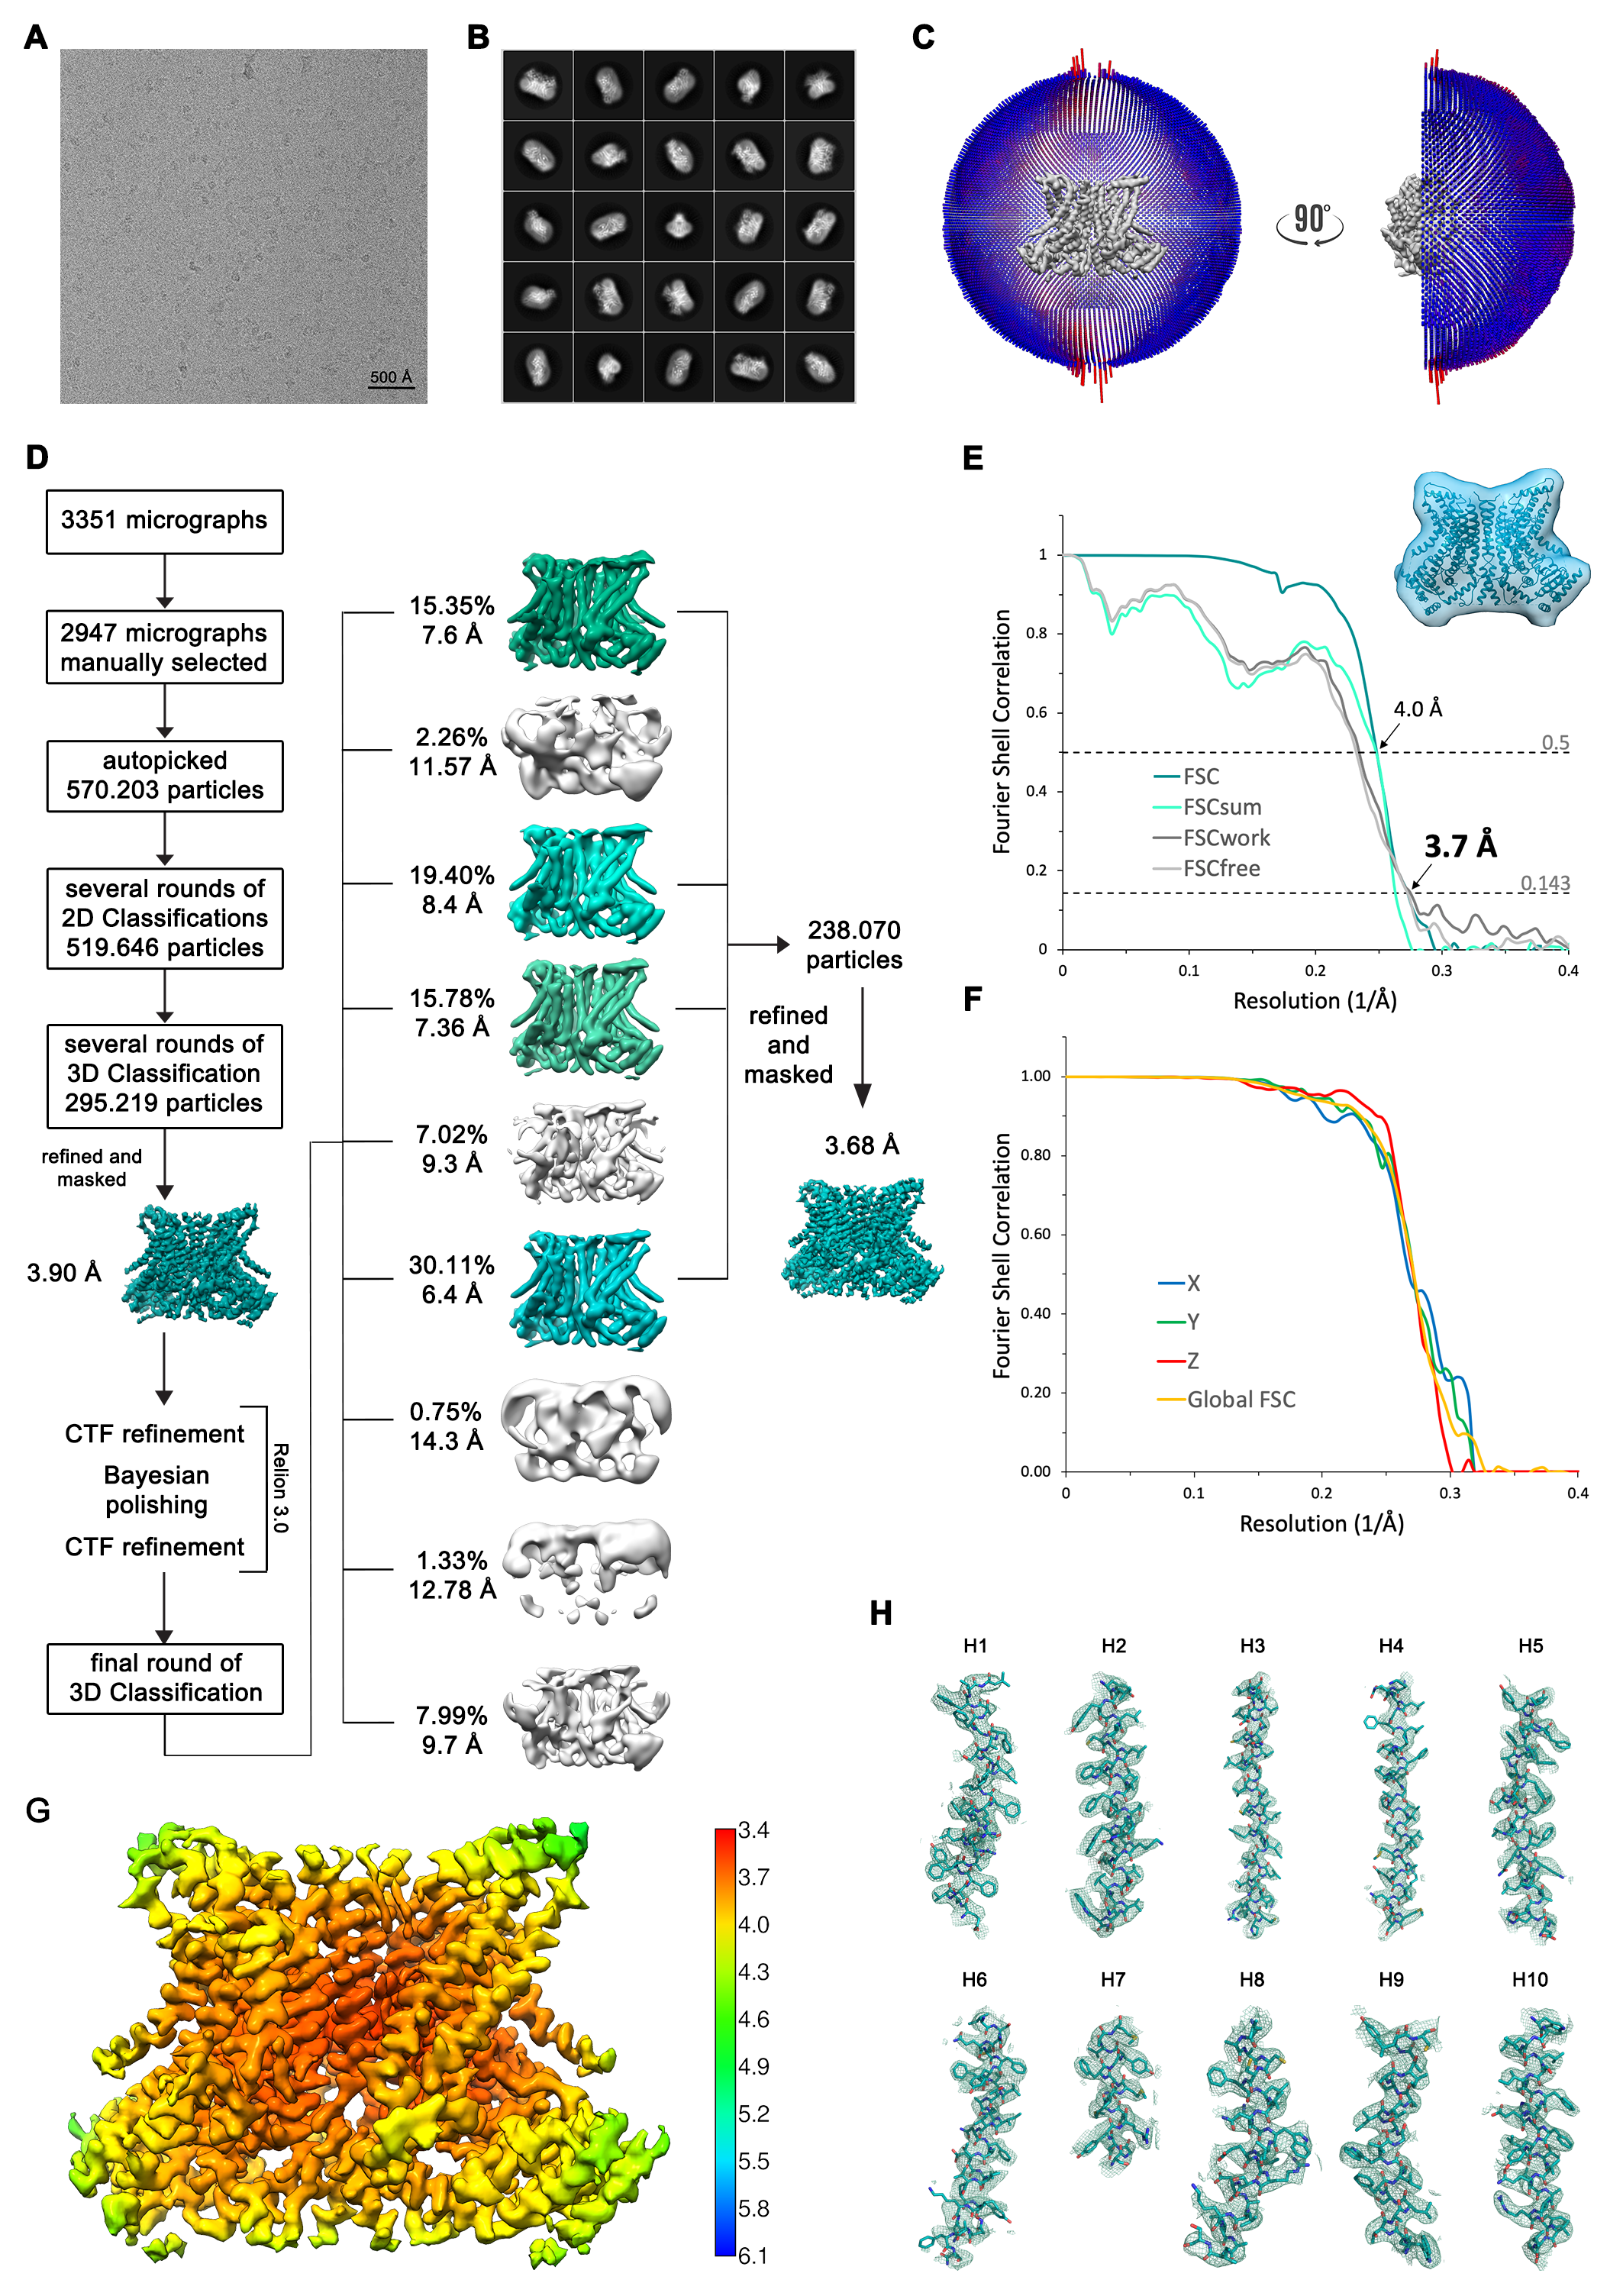

Supplement: supp [file elife-44364-supp-v1.zip › elife_poa_e44364_Figure_1_figure_supplement_3.png]

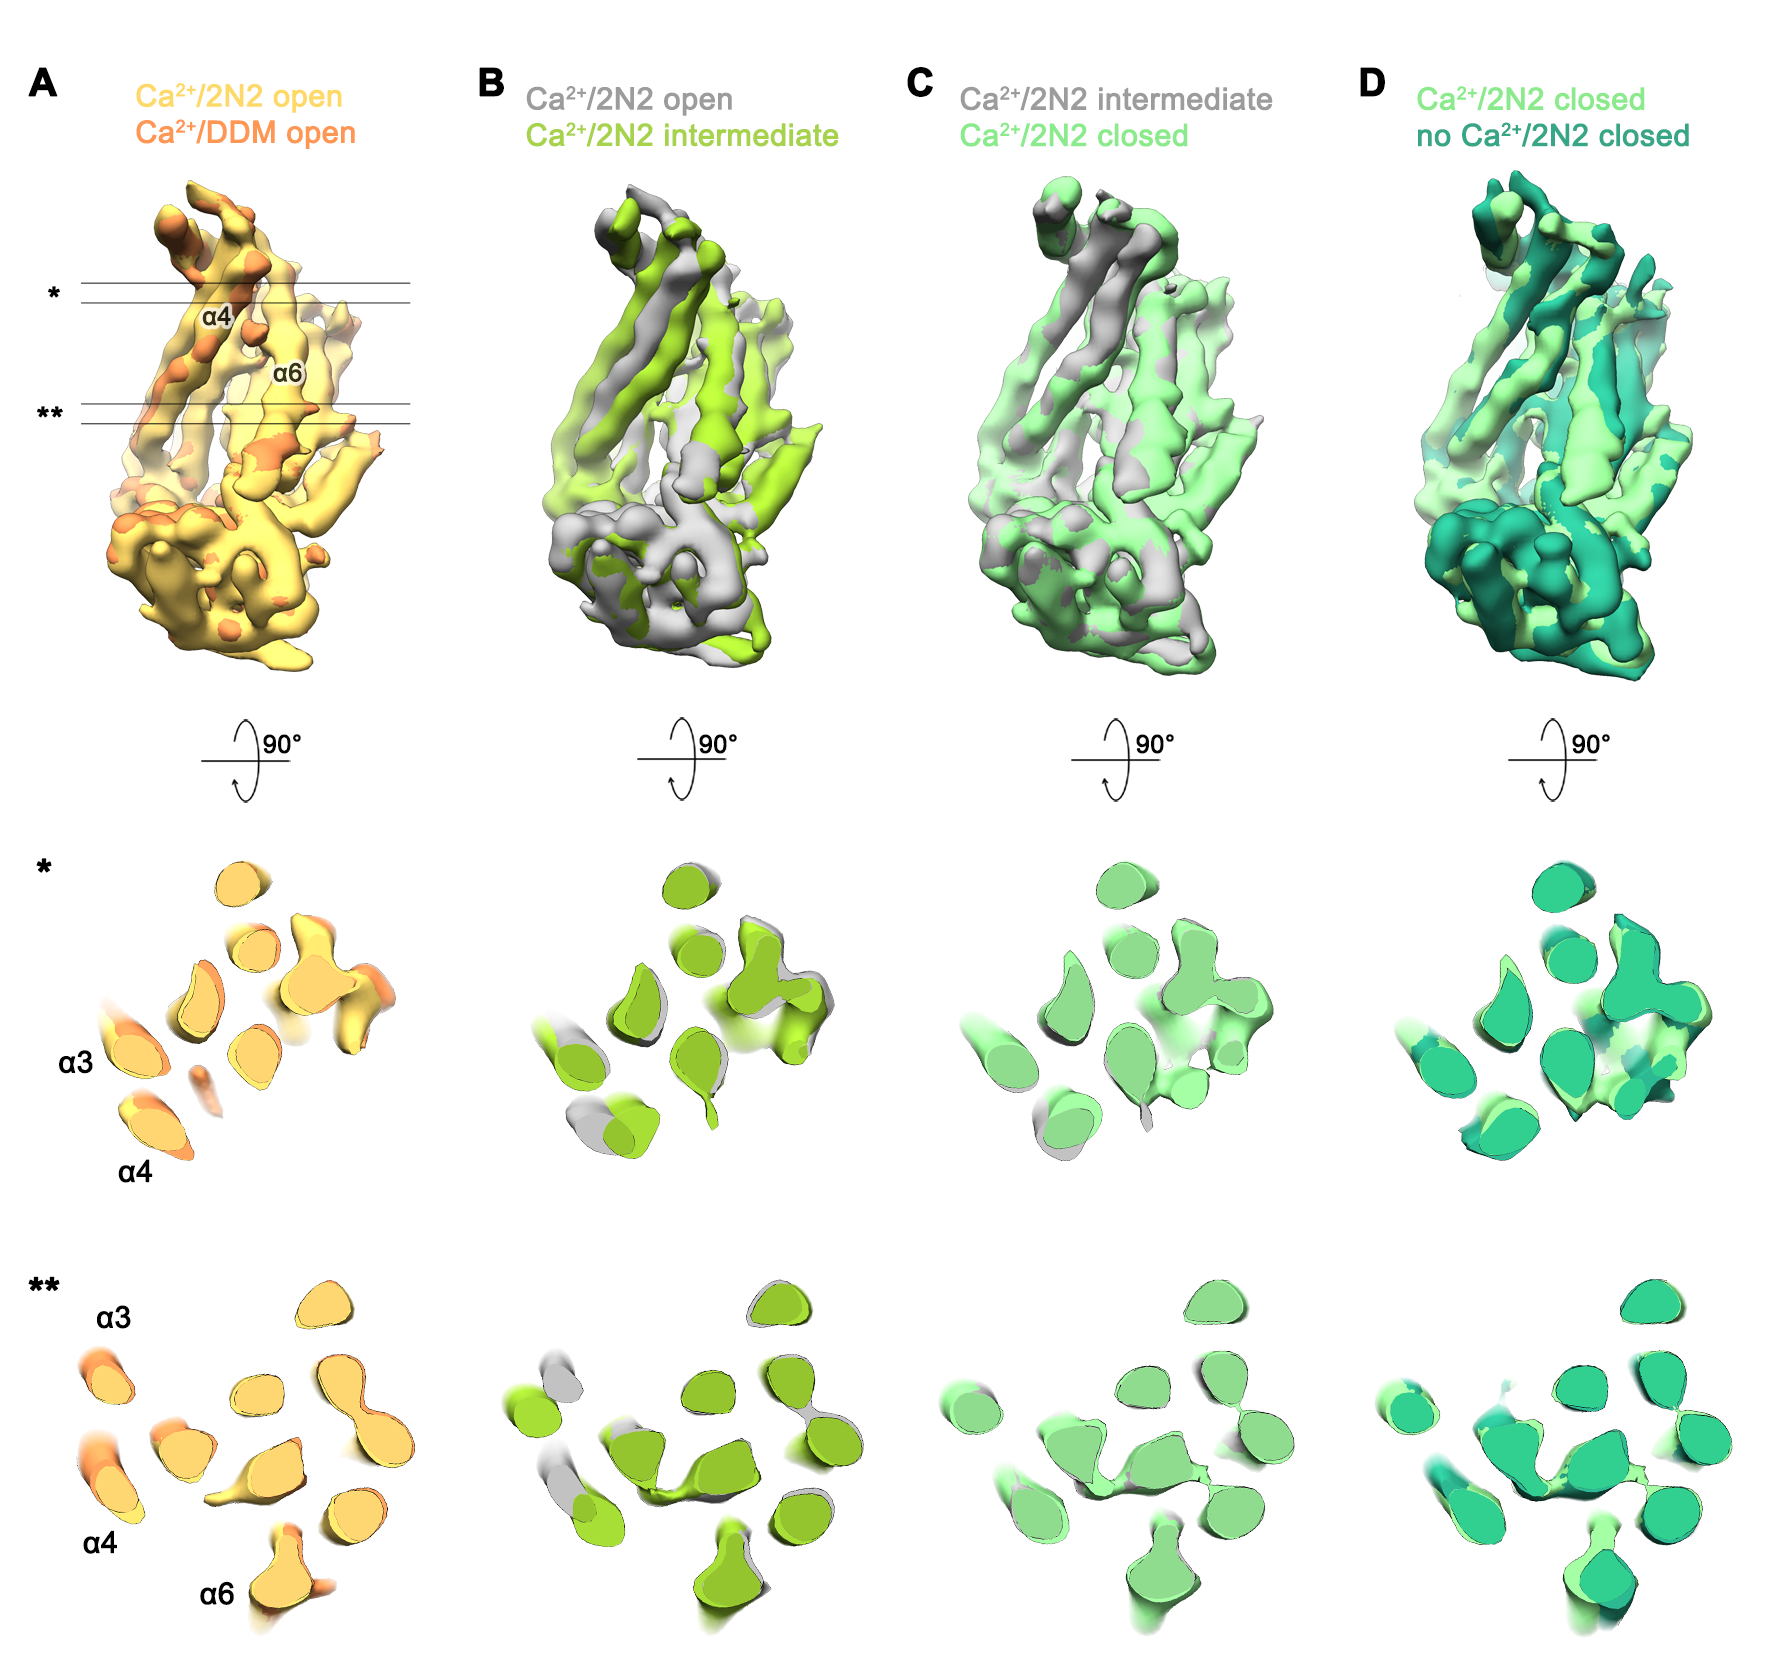

Supplement: supp [file elife-44364-supp-v1.zip › elife_poa_e44364_Figure_3_figure_supplement_2.png]

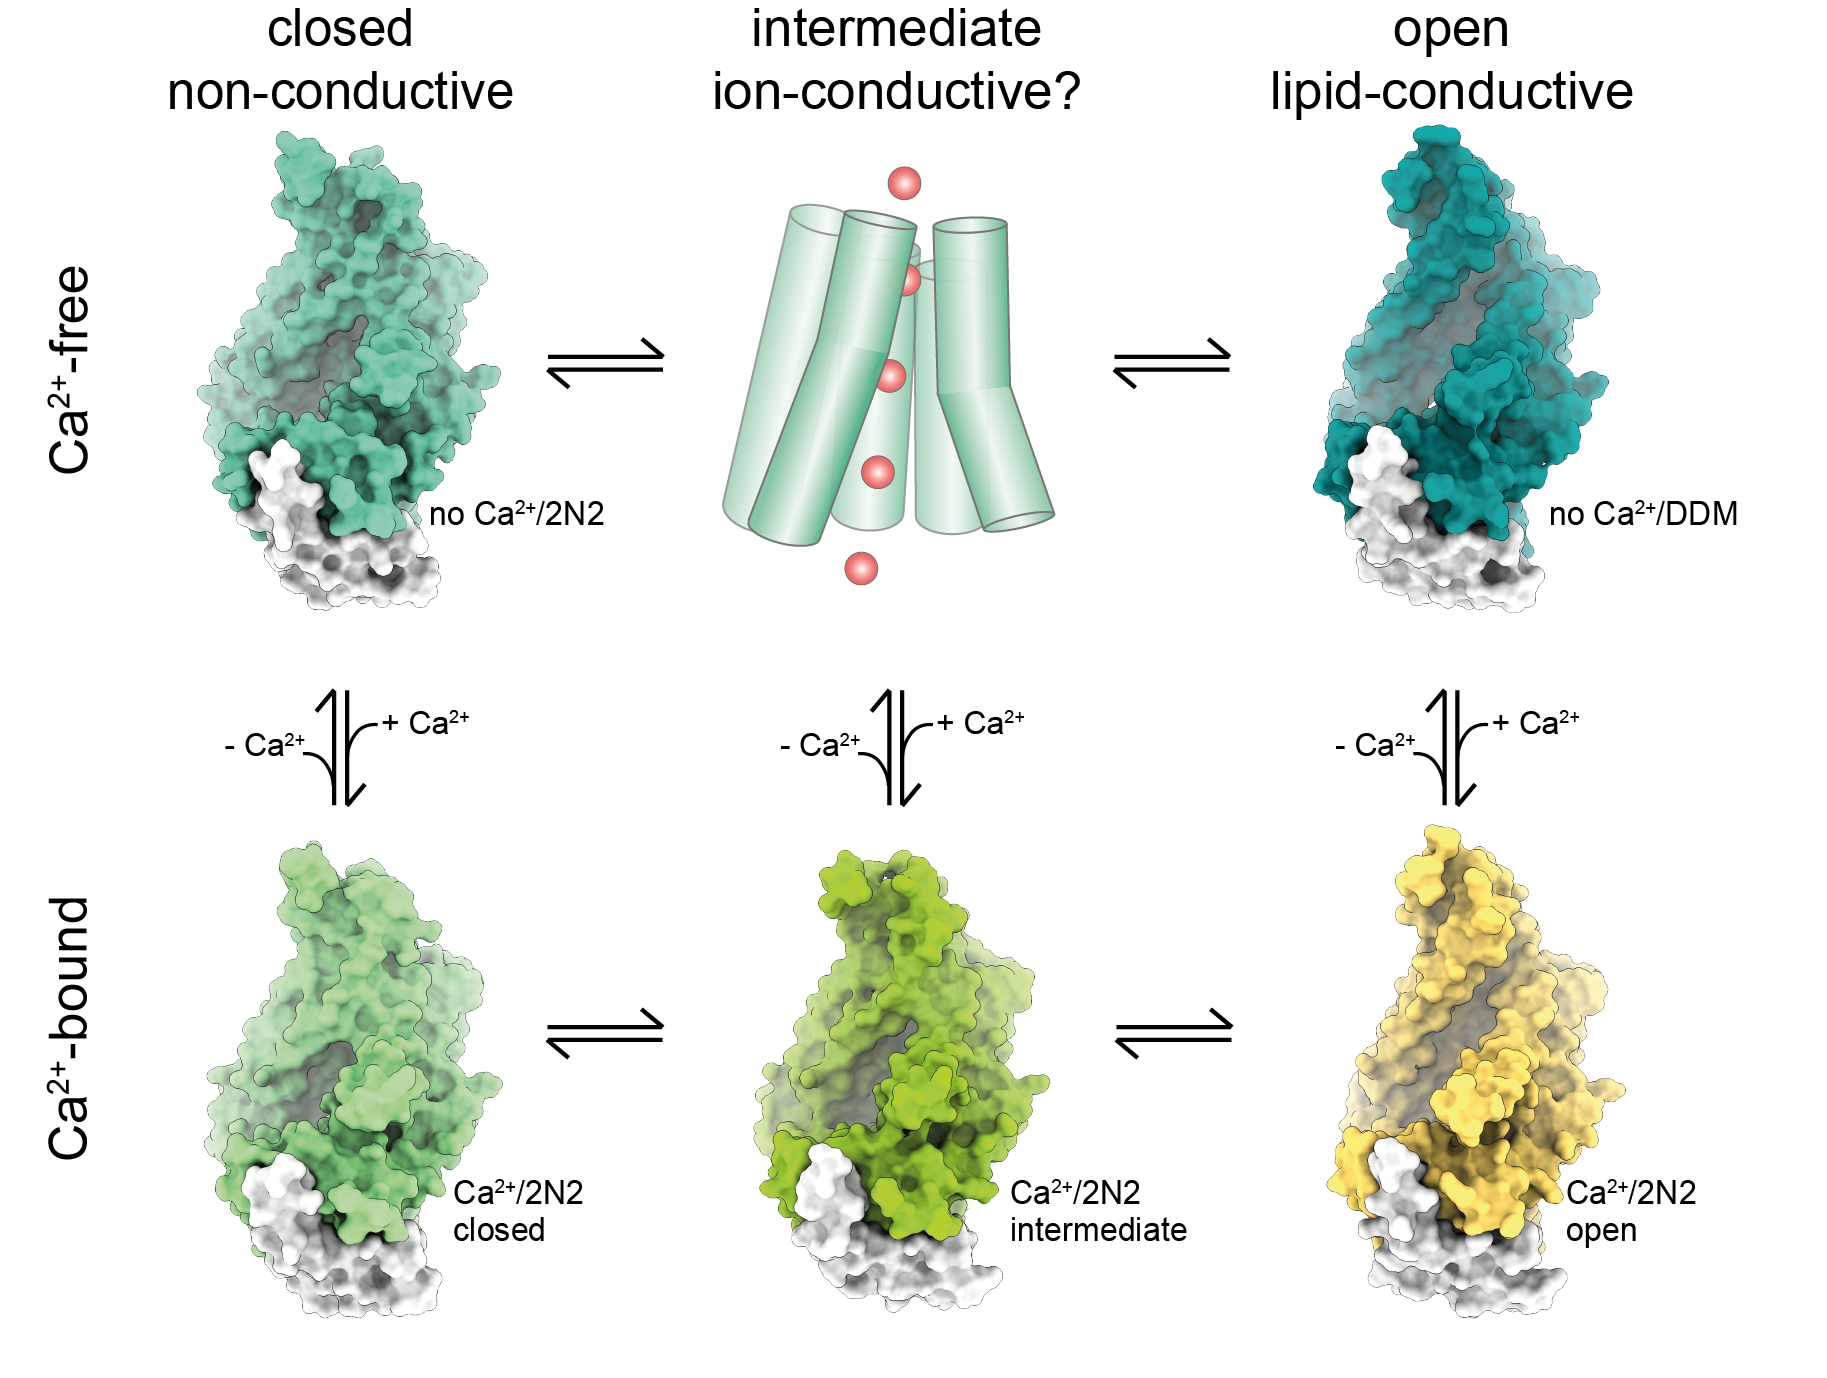

Supplement: supp [file elife-44364-supp-v1.zip › elife_poa_e44364_Figure_8_figure_supplement_1.png]

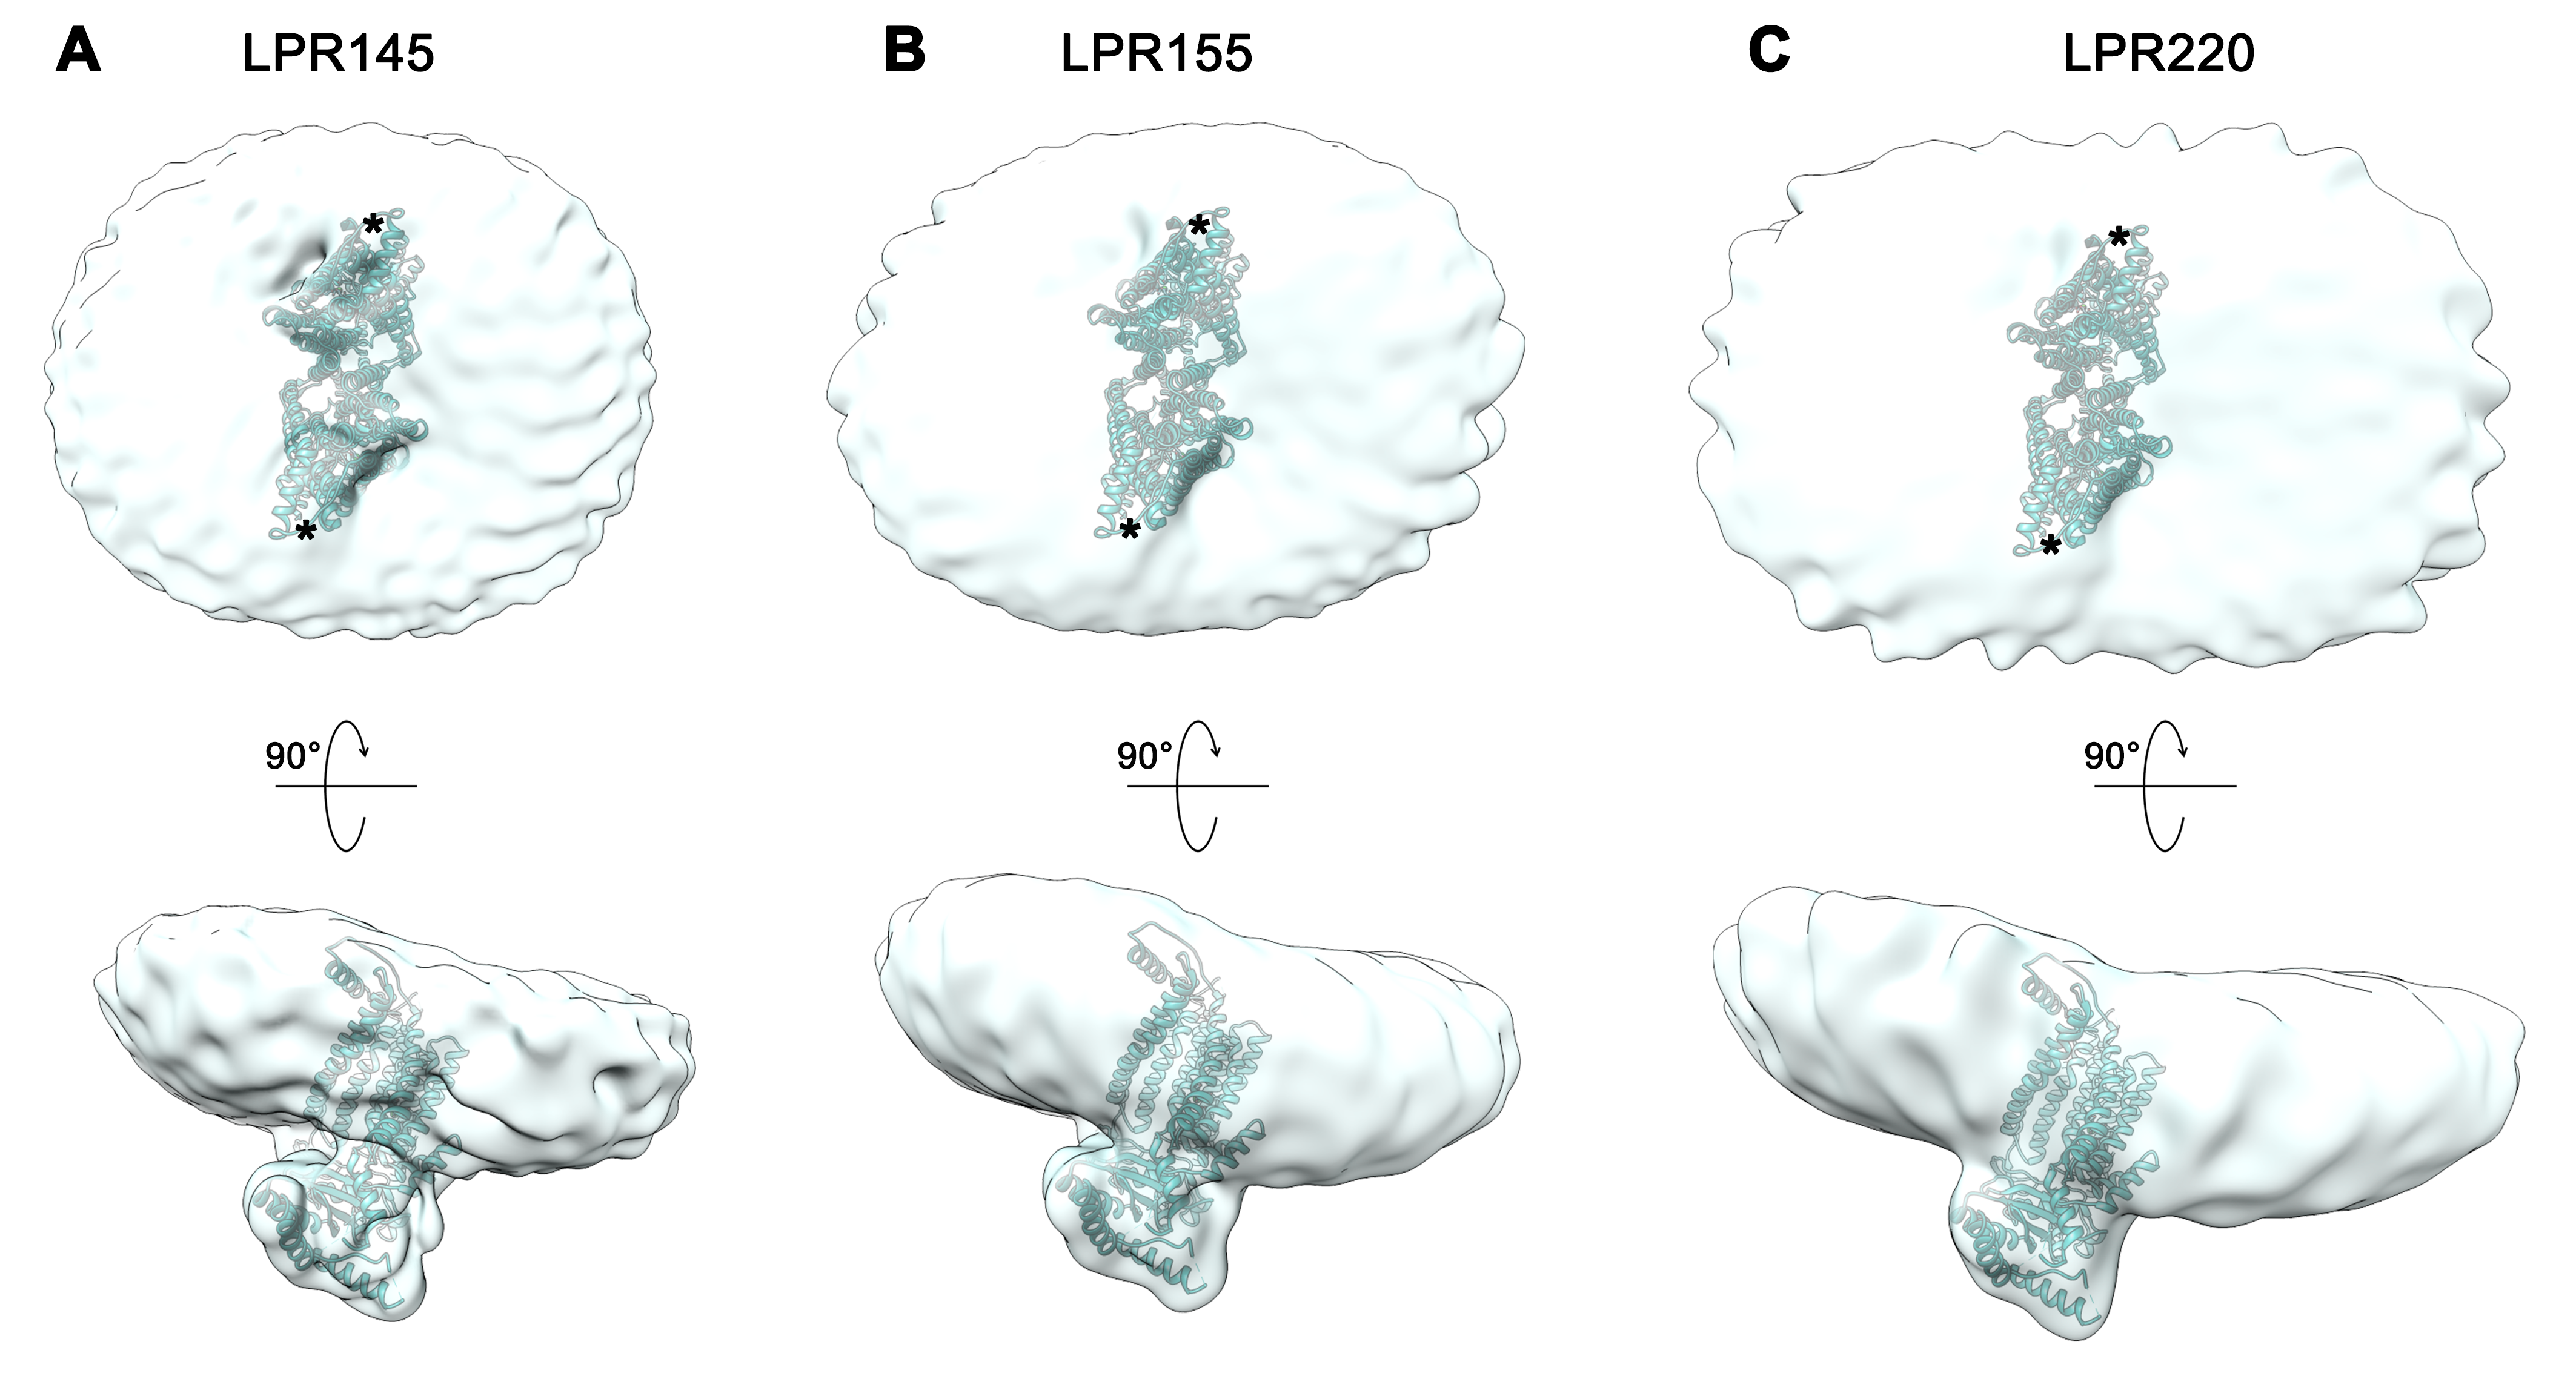

Supplement: supp [file elife-44364-supp-v1.zip › elife_poa_e44364_Figure_2_figure_supplement_1.png]

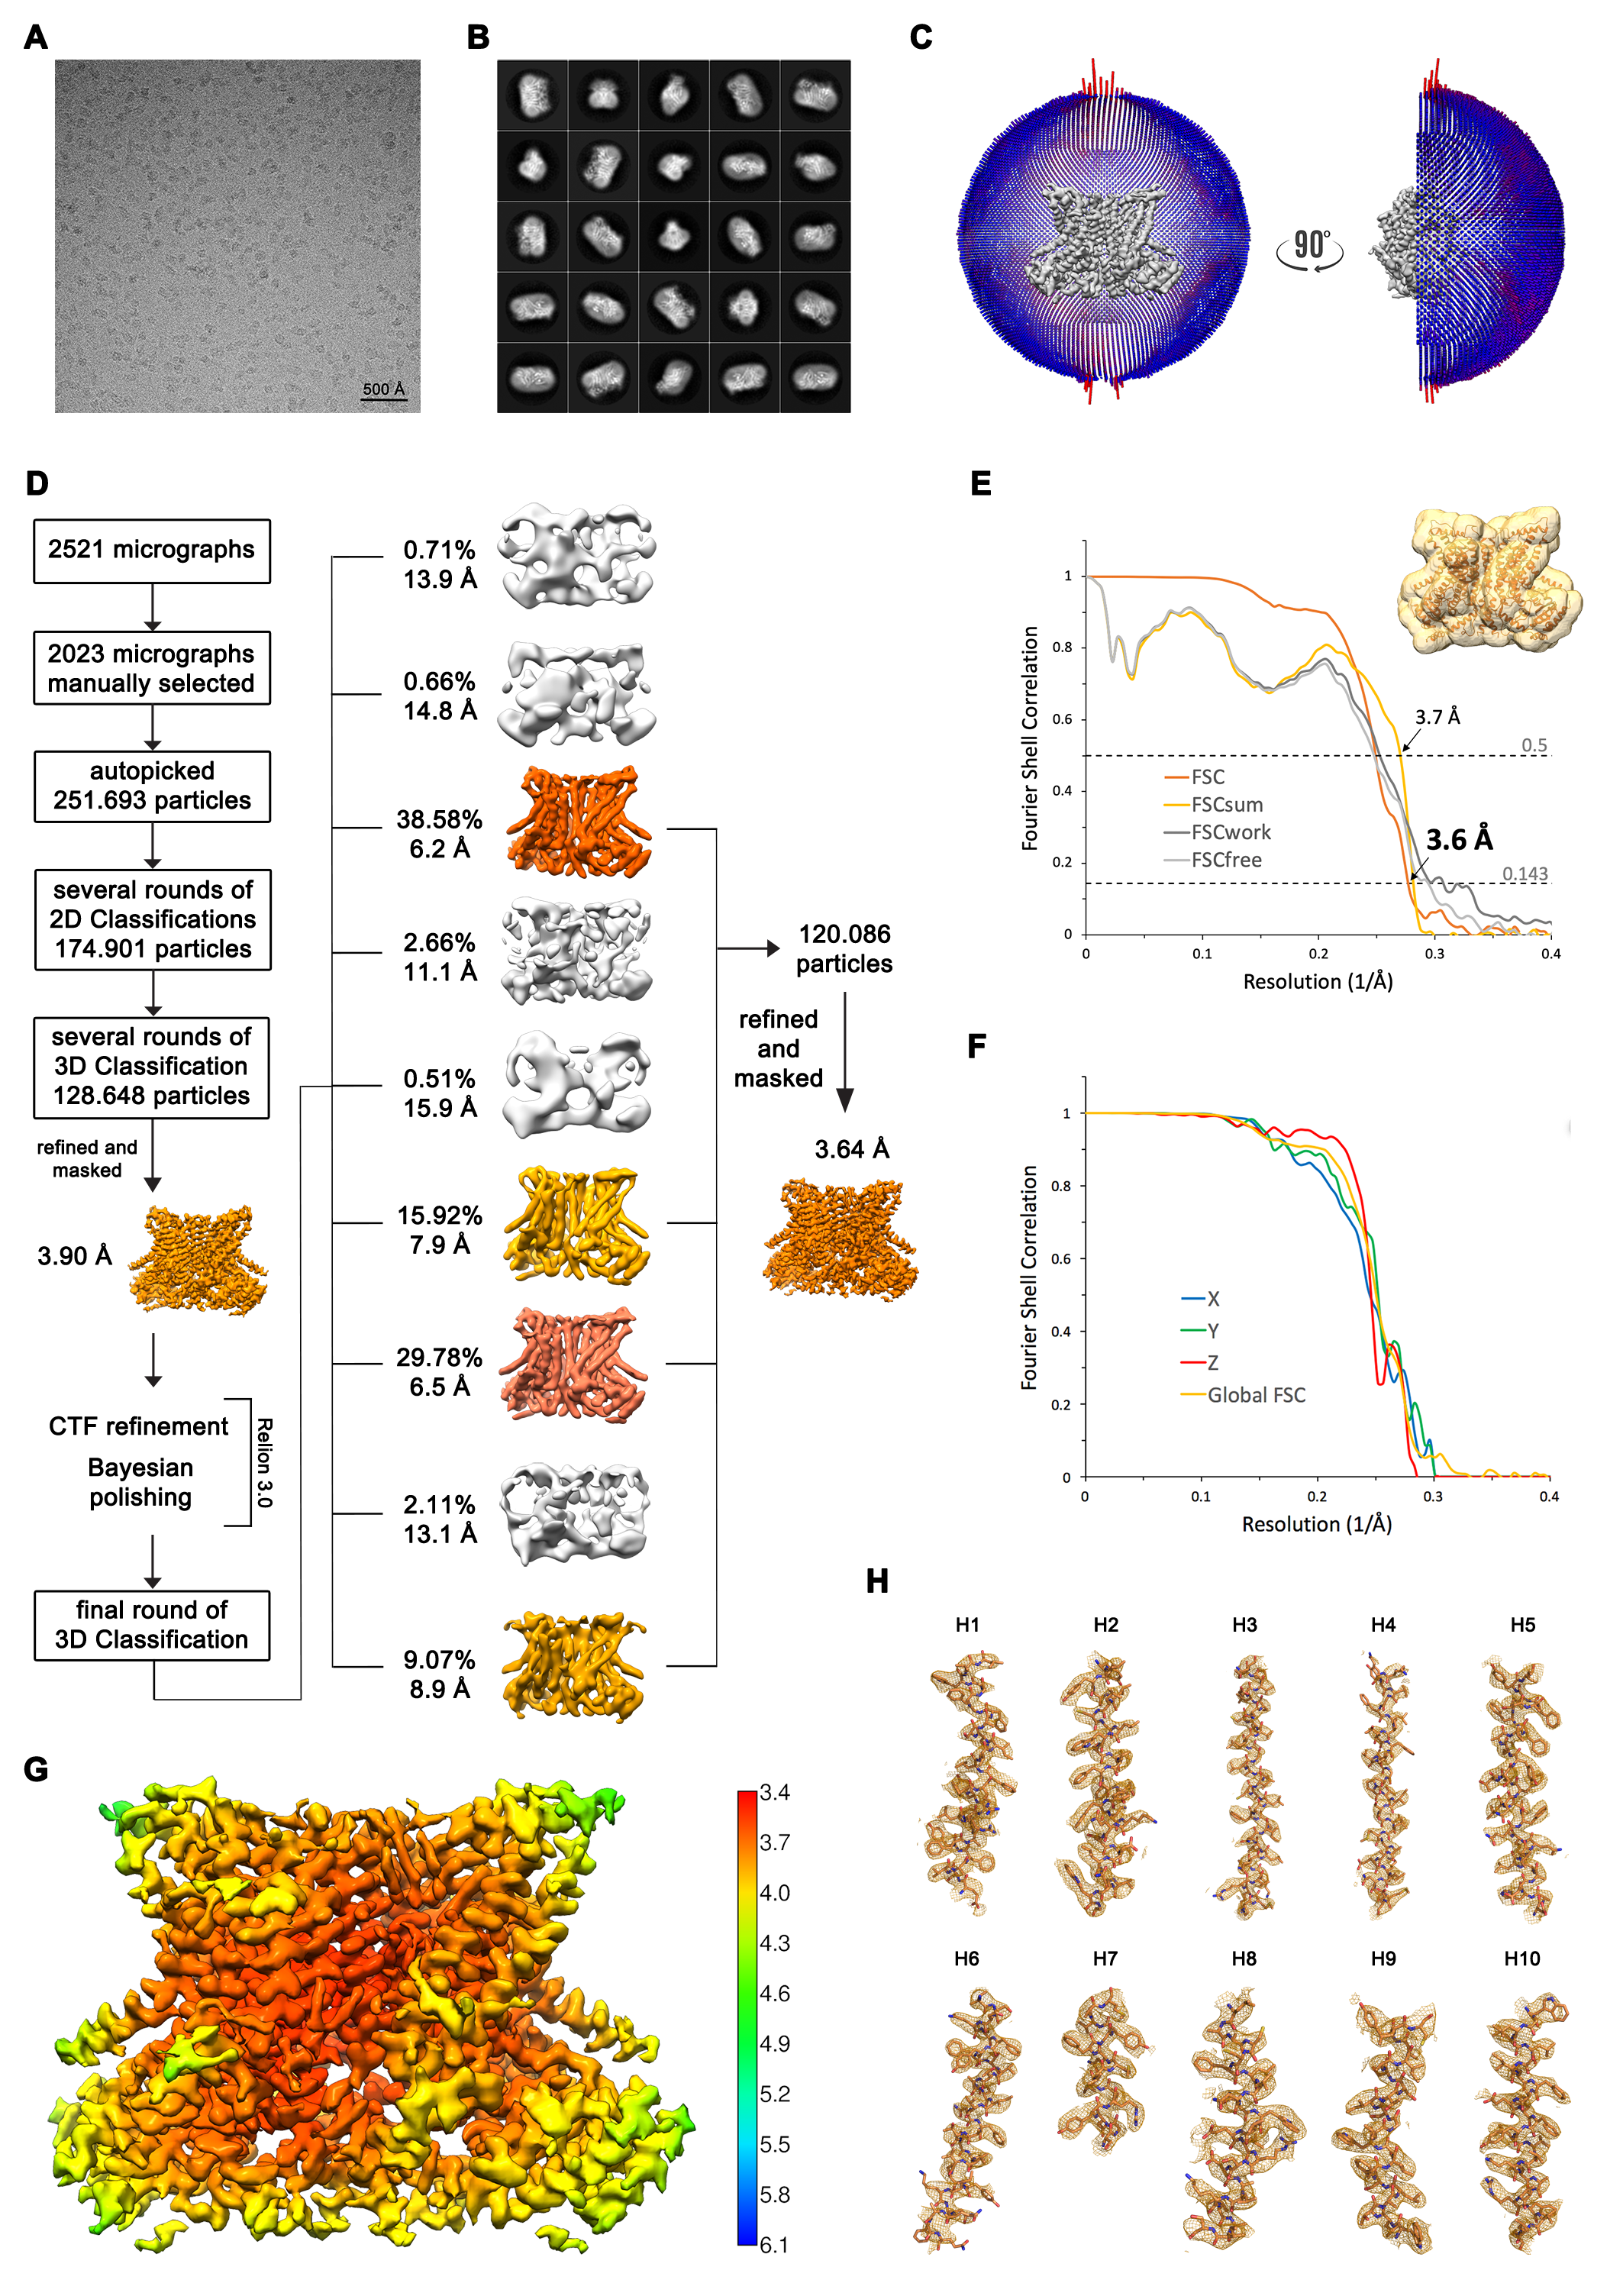

Supplement: supp [file elife-44364-supp-v1.zip › elife_poa_e44364_Figure_1_figure_supplement_2.png]

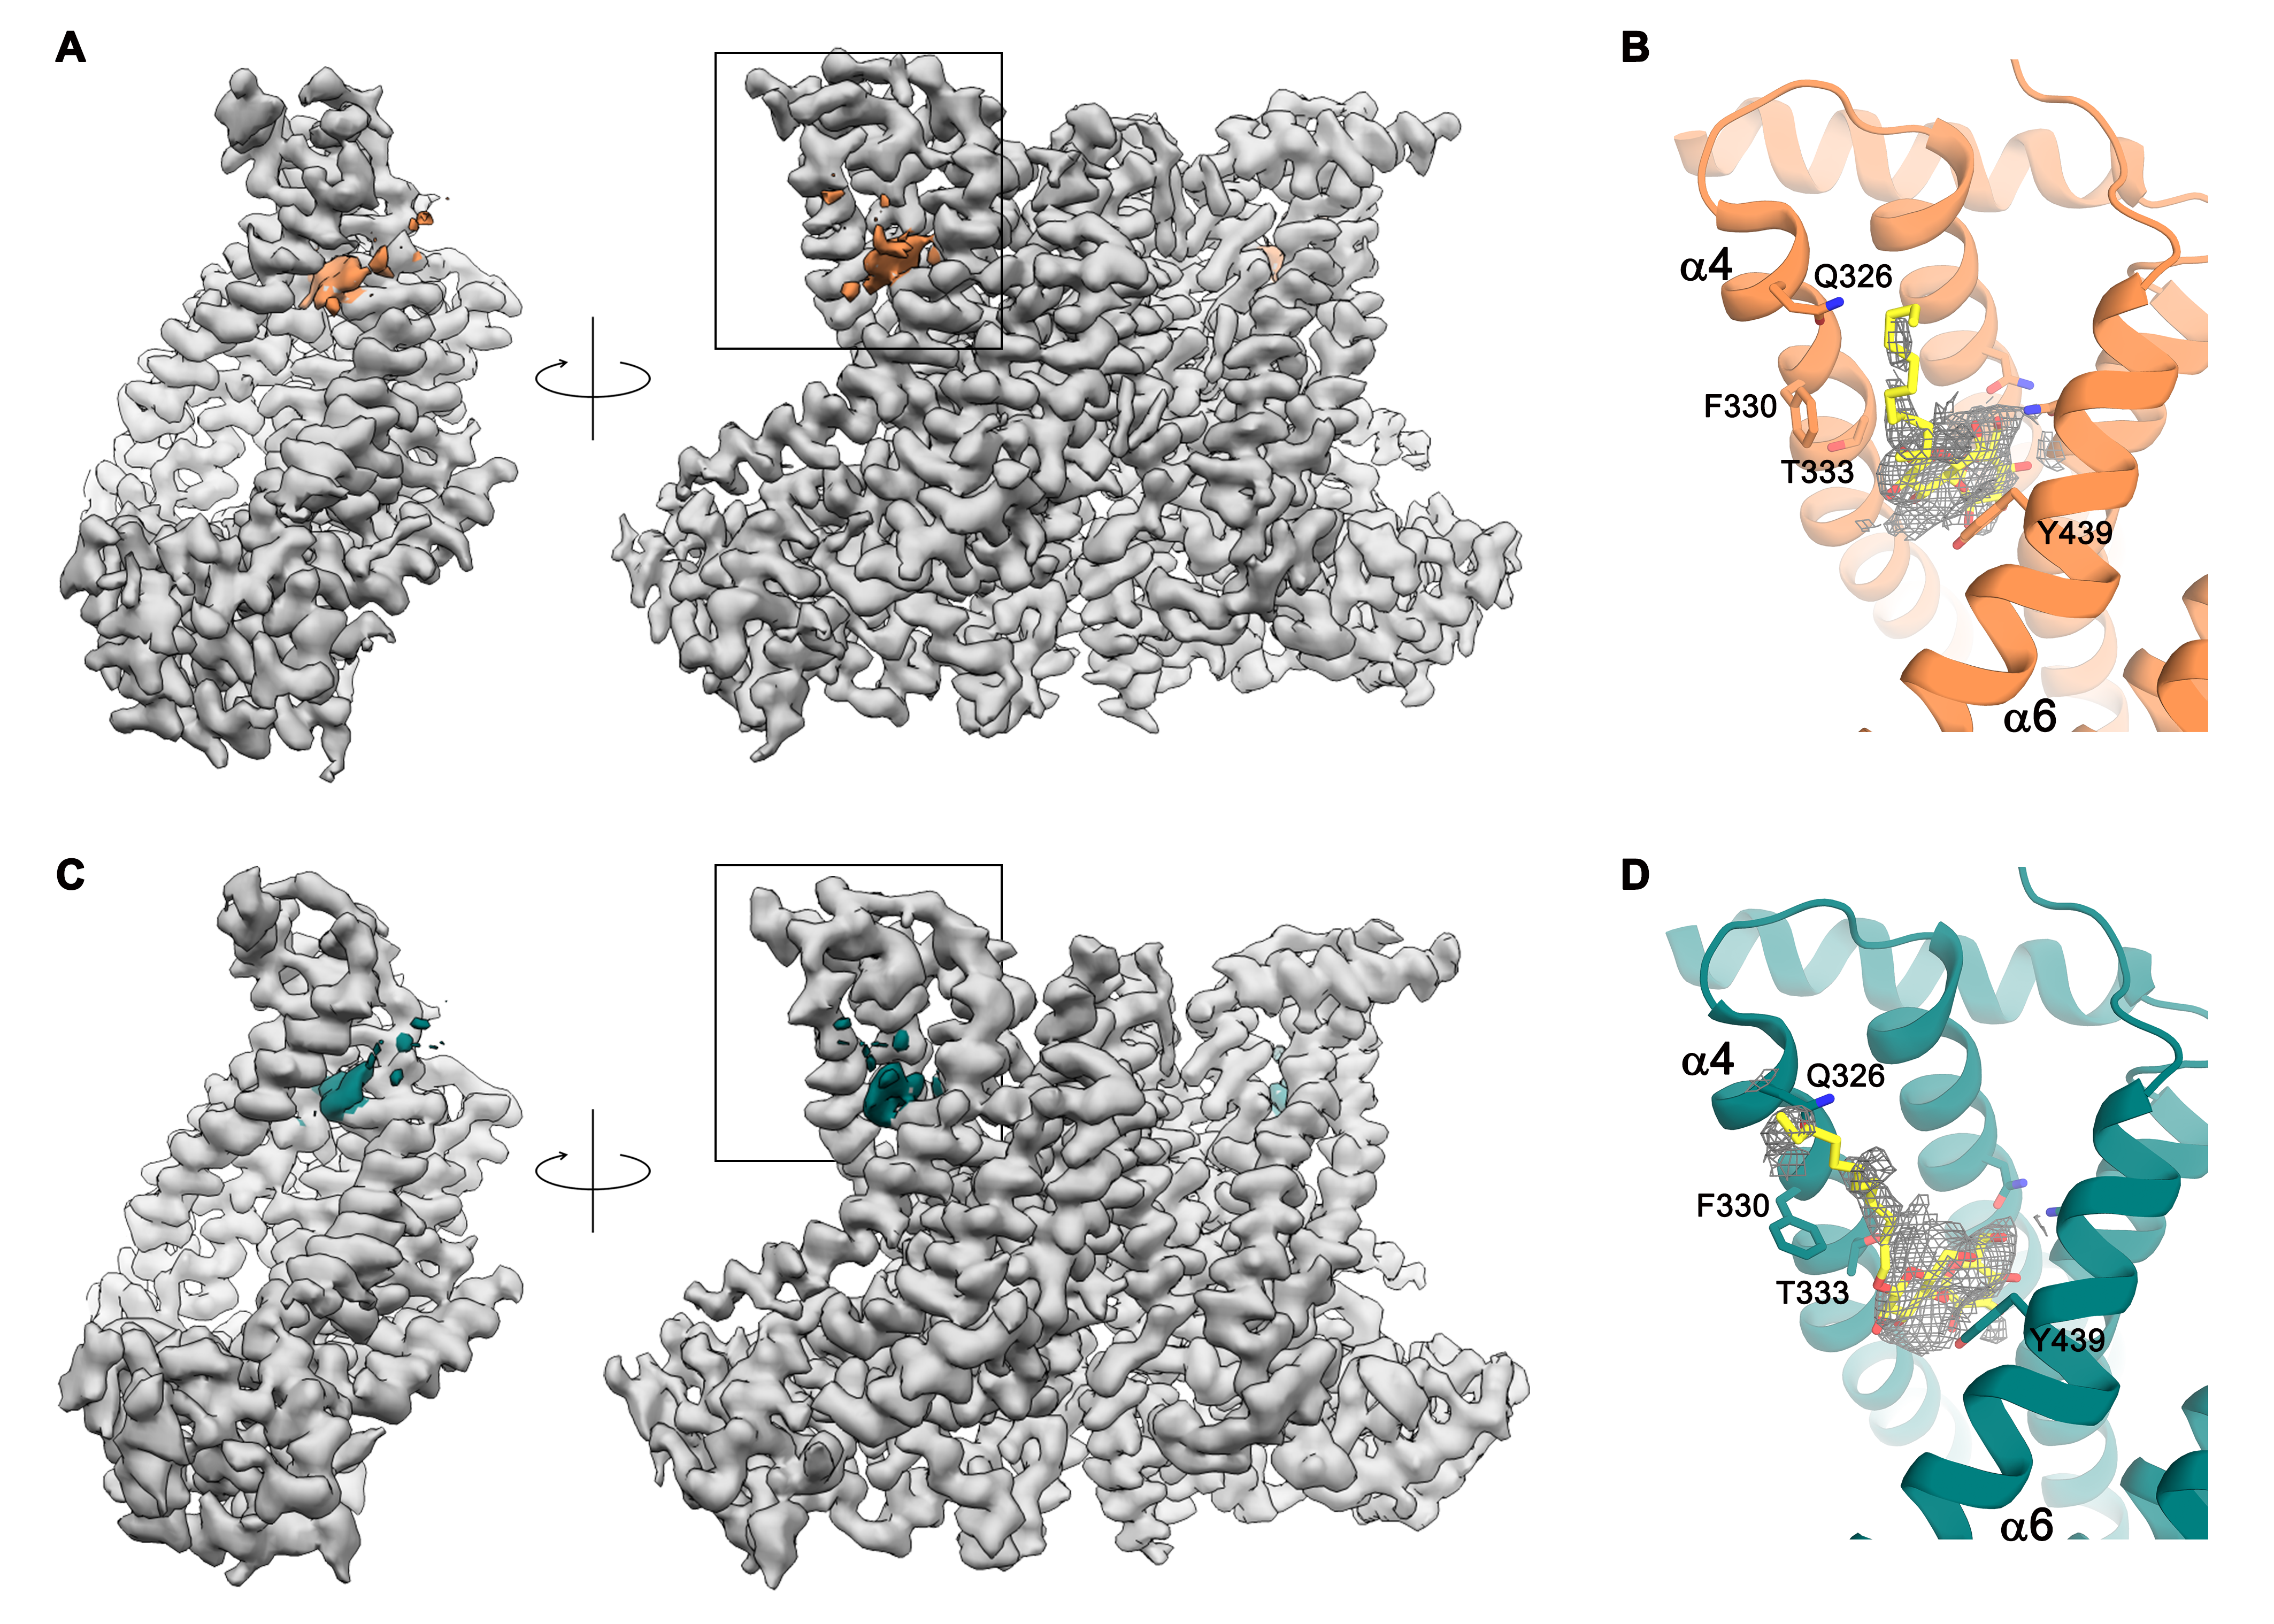

Supplement: supp [file elife-44364-supp-v1.zip › elife_poa_e44364_Figure_1_figure_supplement_5.png]

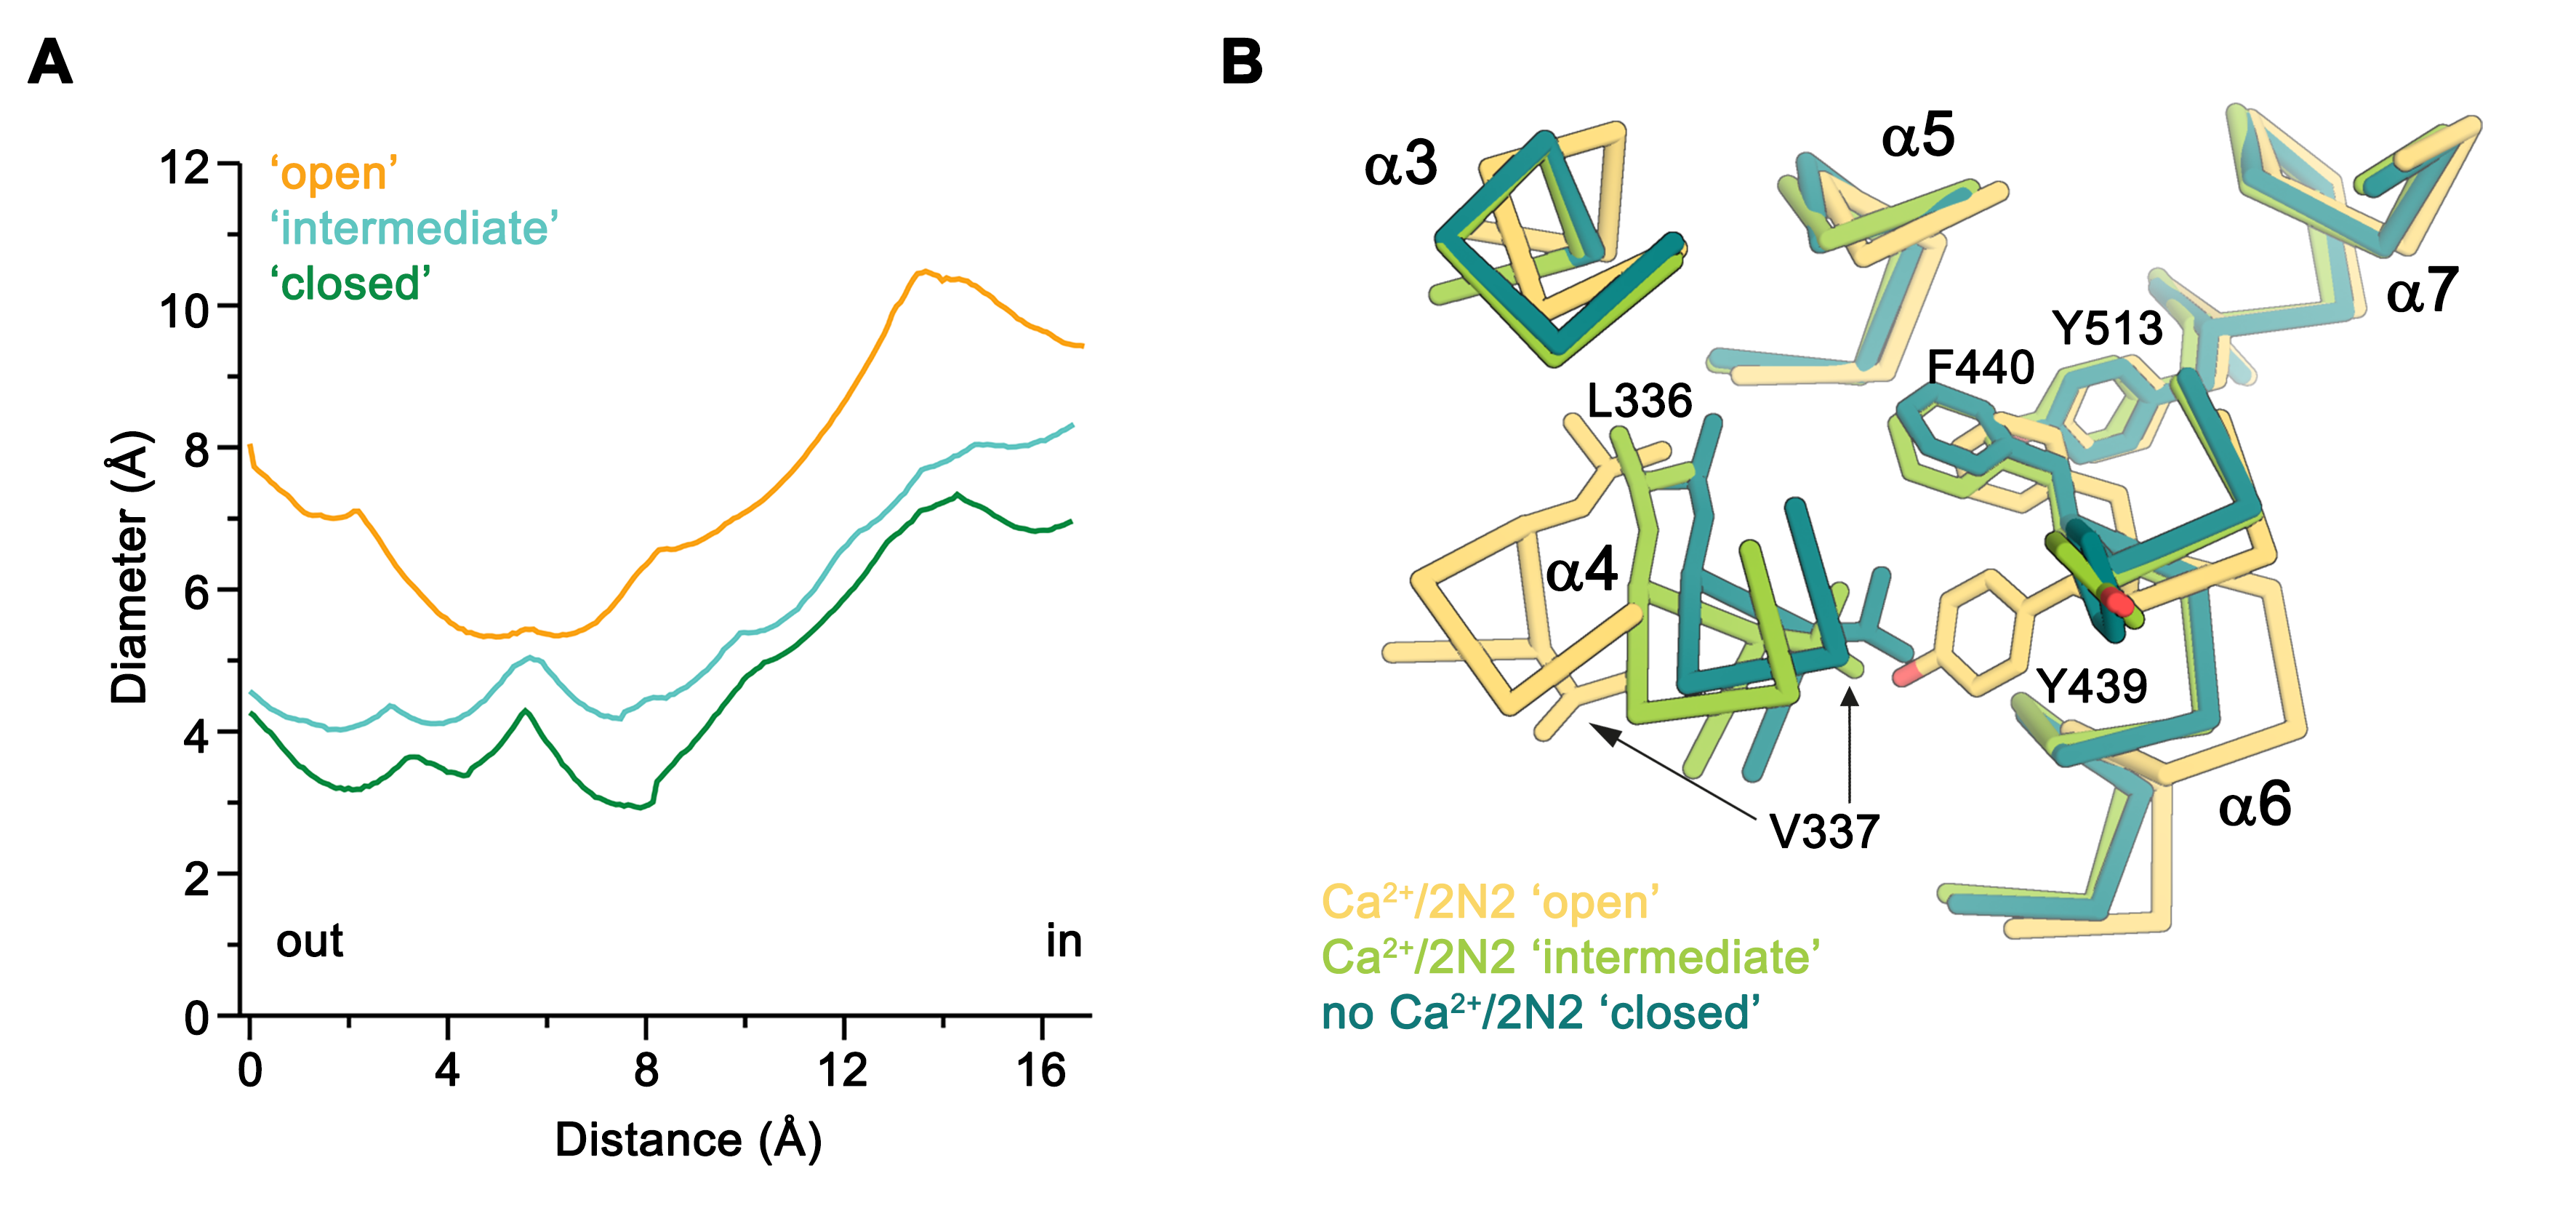

Supplement: supp [file elife-44364-supp-v1.zip › elife_poa_e44364_Figure_5_figure_supplement_1.png]

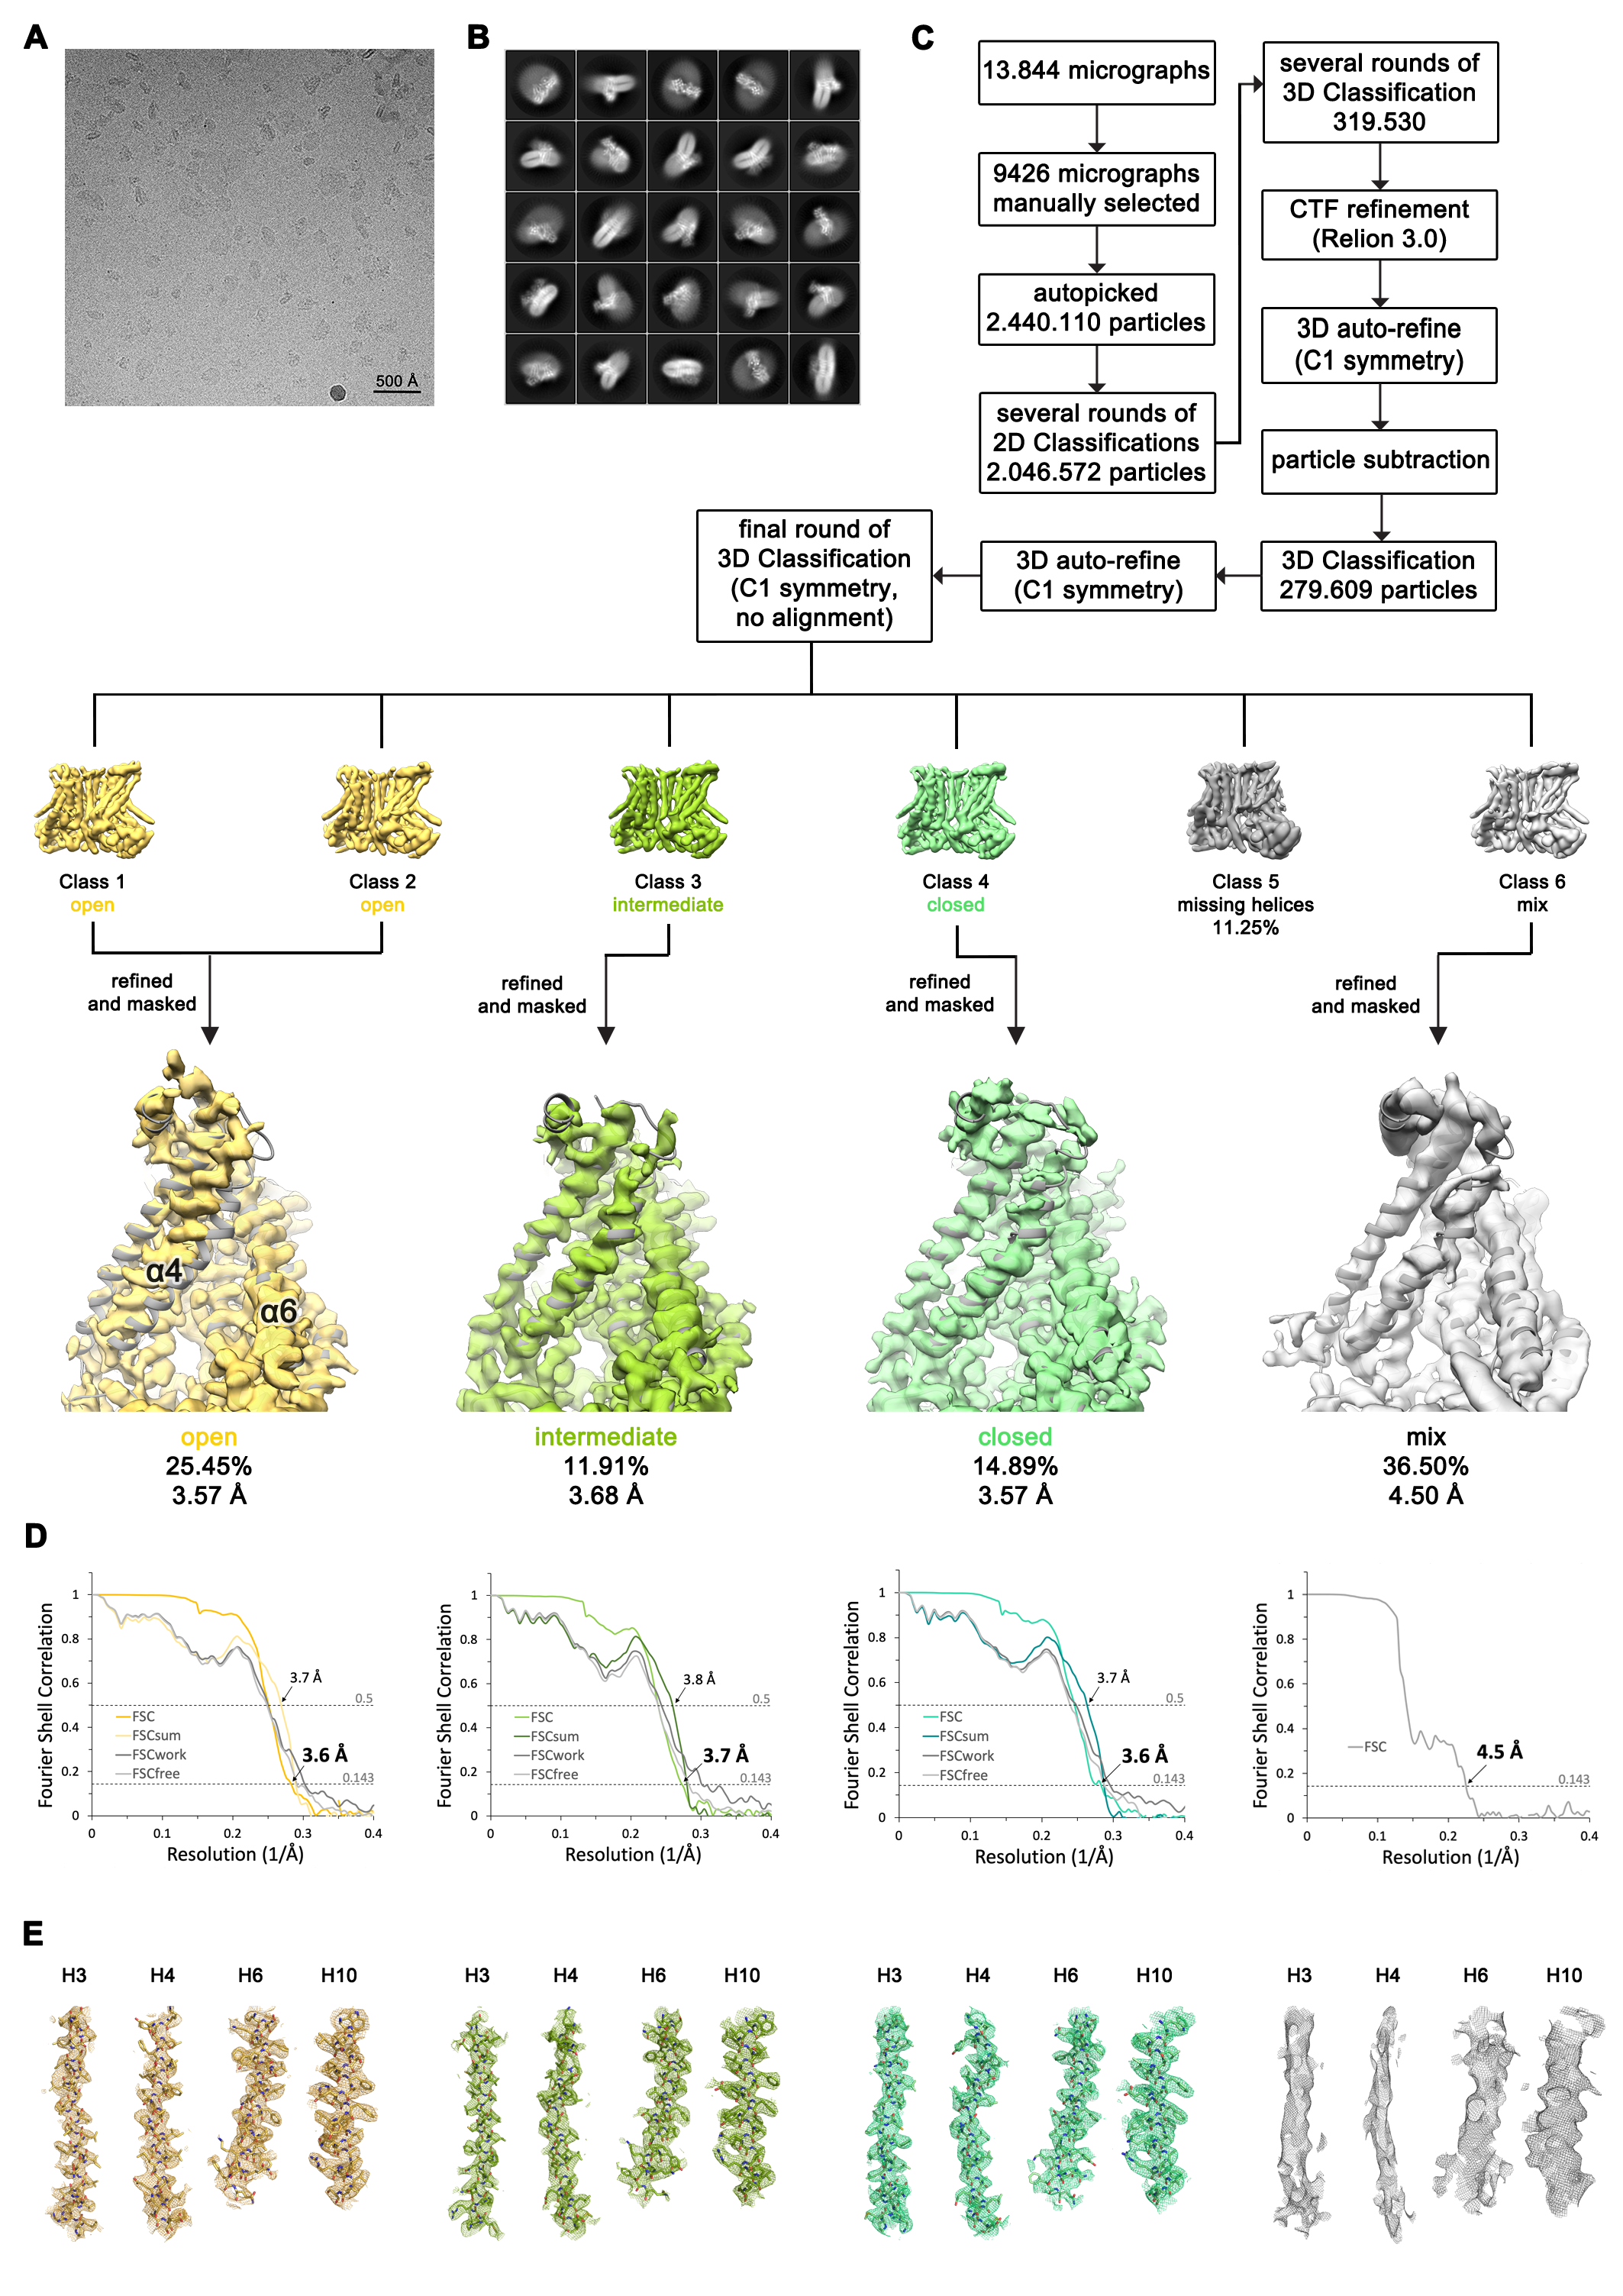

Supplement: supp [file elife-44364-supp-v1.zip › elife_poa_e44364_Figure_3_figure_supplement_1.png]
